# Supplementary material for: Do Th17 Lymphocytes and IL-17 Contribute to Parkinson's Disease? A Systematic Review of Available Evidence
Source: Front Neurol. 2019 Jan 24;10:13. doi: 10.3389/fneur.2019.00013 (PMC6353825; doi:10.3389/fneur.2019.00013)
Supplement: Supplementary file 1 [file Table_1.XLSX]

## Sheet: Foglio1
Supplemetary table: List of all works considered in the literature search. For each entry it is indicated on which database it was found and if it was included in the review or not.
references	database			inclusion
Chen Y, Qi B, Xu W, Ma B, Li L, Chen Q, Qian W, Liu X, Qu H. Clinical correlation of peripheral CD4+‑cell sub‑sets, their imbalance and Parkinson's disease. Mol Med Rep. 2015 Oct;12(4):6105-11. doi: 10.3892/mmr.2015.4136. Epub 2015 Jul 29. PubMed PMID: 26239429.	PUBMED	SCOPUS	-	NO
Chen Y, Yu M, Liu X, Qu H, Chen Q, Qian W, Wei D, Xu W, Ma B, Wu W. Clinical characteristics and peripheral T cell subsets in Parkinson's disease patients with constipation. Int J Clin Exp Pathol. 2015 Mar 1;8(3):2495-504. eCollection 2015. PubMed PMID: 26045755; PubMed Central PMCID: PMC4440064.	PUBMED	SCOPUS	-	INCLUDED
Reynolds AD, Stone DK, Hutter JA, Benner EJ, Mosley RL, Gendelman HE. Regulatory T cells attenuate Th17 cell-mediated nigrostriatal dopaminergic neurodegeneration in a model of Parkinson's disease. J Immunol. 2010 Mar 1;184(5):2261-71. doi: 10.4049/jimmunol.0901852. Epub 2010 Jan 29. PubMed PMID: 20118279; PubMed Central PMCID: PMC2824790.	PUBMED	SCOPUS	-	INCLUDED
Parkinson RM, Collins SL, Horton MR, Powell JD. Egr3 induces a Th17 response by promoting the development of γδ T cells. PLoS One. 2014 Jan 24;9(1):e87265. doi: 10.1371/journal.pone.0087265. eCollection 2014. PubMed PMID: 24475259; PubMed Central PMCID: PMC3901773.	PUBMED	SCOPUS	-	NO
Niwa F, Kuriyama N, Nakagawa M, Imanishi J. Effects of peripheral lymphocyte subpopulations and the clinical correlation with Parkinson's disease. Geriatr Gerontol Int. 2012 Jan;12(1):102-7. doi: 10.1111/j.1447-0594.2011.00740.x. Epub 2011 Sep 19. PubMed PMID: 21929737.	PUBMED	SCOPUS	-	INCLUDED
Contreras F, Prado C, González H, Franz D, Osorio-Barrios F, Osorio F, Ugalde V, Lopez E, Elgueta D, Figueroa A, Lladser A, Pacheco R. Dopamine Receptor D3 Signaling on CD4+ T Cells Favors Th1- and Th17-Mediated Immunity. J Immunol. 2016 May 15;196(10):4143-9. doi: 10.4049/jimmunol.1502420. Epub 2016 Apr 18. PubMed PMID: 27183640.	PUBMED	SCOPUS	-	NO
González H, Pacheco R. T-cell-mediated regulation of neuroinflammation involved in neurodegenerative diseases. J Neuroinflammation. 2014 Dec 2;11:201. doi: 10.1186/s12974-014-0201-8. Review. PubMed PMID: 25441979; PubMed Central PMCID: PMC4258012.	PUBMED	SCOPUS	-	NO
Wandu WS, Tan C, Ogbeifun O, Vistica BP, Shi G, Hinshaw SJ, Xie C, Chen X, Klinman DM, Cai H, Gery I. Leucine-Rich Repeat Kinase 2 (Lrrk2) Deficiency Diminishes the Development of Experimental Autoimmune Uveitis (EAU) and the Adaptive Immune Response. PLoS One. 2015 Jun 11;10(6):e0128906. doi: 10.1371/journal.pone.0128906. eCollection 2015. PubMed PMID: 26067490; PubMed Central PMCID: PMC4465928.	PUBMED	SCOPUS	-	NO
Hwang DS, Kim SK, Bae H. Therapeutic Effects of Bee Venom on Immunological and Neurological Diseases. Toxins (Basel). 2015 Jun 29;7(7):2413-21. doi: 10.3390/toxins7072413. Review. PubMed PMID: 26131770; PubMed Central PMCID: PMC4516920.	PUBMED	SCOPUS	SCIENCE DIRECT	NO
Chen S, Liu Y, Niu Y, Xu Y, Zhou Q, Xu X, Wang J, Yu M. Increased abundance of myeloid-derived suppressor cells and Th17 cells in peripheral blood of newly-diagnosed Parkinson's disease patients. Neurosci Lett. 2017 May 1;648:21-25. doi: 10.1016/j.neulet.2017.03.045. Epub 2017 Mar 28. PubMed PMID: 28359932.	PUBMED	SCOPUS	-	INCLUDED
Yang L, Guo C, Zhu J, Feng Y, Chen W, Feng Z, Wang D, Sun S, Lin W, Wang Y. Increased Levels of Pro-Inflammatory and Anti-Inflammatory Cellular Responses in Parkinson's Disease Patients: Search for a Disease Indicator. Med Sci Monit. 2017 Jun 18;23:2972-2978. PubMed PMID: 28624842; PubMed Central PMCID: PMC5484607.	PUBMED	SCOPUS	-	INCLUDED
Park J, Lee JW, Cooper SC, Broxmeyer HE, Cannon JR, Kim CH. Parkinson disease-associated LRRK2 G2019S transgene disrupts marrow myelopoiesis and peripheral Th17 response. J Leukoc Biol. 2017 Oct;102(4):1093-1102. doi: 10.1189/jlb.1A0417-147RR. Epub 2017 Jul 27. PubMed PMID: 28751472; PubMed Central PMCID: PMC5597519.	PUBMED	SCOPUS	-	INCLUDED
Tahmasebinia F, Pourgholaminejad A. The role of Th17 cells in auto-inflammatory neurological disorders. Prog Neuropsychopharmacol Biol Psychiatry. 2017 Oct 3;79(Pt B):408-416. doi: 10.1016/j.pnpbp.2017.07.023. Epub 2017 Jul 29. Review. PubMed PMID: 28760387.	PUBMED	SCOPUS	SCIENCE DIRECT	NO
Levite M. Dopamine and T cells: dopamine receptors and potent effects on T cells, dopamine production in T cells, and abnormalities in the dopaminergic system in T cells in autoimmune, neurological and psychiatric diseases. Acta Physiol (Oxf). 2016 Jan;216(1):42-89. doi: 10.1111/apha.12476. Epub 2015 Sep 24. Review. PubMed PMID: 25728499.	PUBMED	SCOPUS	-	NO
Liu Z, Huang Y, Cao BB, Qiu YH, Peng YP. Th17 Cells Induce Dopaminergic Neuronal Death via LFA-1/ICAM-1 Interaction in a Mouse Model of Parkinson's Disease. Mol Neurobiol. 2017 Dec;54(10):7762-7776. doi: 10.1007/s12035-016-0249-9. Epub 2016 Nov 14. PubMed PMID: 27844285.	PUBMED	SCOPUS	-	INCLUDED
Podbielska M, Das A, Smith AW, Chauhan A, Ray SK, Inoue J, Azuma M, Nozaki K, Hogan EL, Banik NL. Neuron-microglia interaction induced bi-directional cytotoxicity associated with calpain activation. J Neurochem. 2016 Nov;139(3):440-455. doi: 10.1111/jnc.13774. Epub 2016 Oct 18. Erratum in: J Neurochem. 2018 Jan;144(2):234. PubMed PMID: 27529445; PubMed Central PMCID: PMC5374727.	PUBMED	SCOPUS	-	NO
Watson MB, Nobuta H, Abad C, Lee SK, Bala N, Zhu C, Richter F, Chesselet MF, Waschek JA. PACAP deficiency sensitizes nigrostriatal dopaminergic neurons to paraquat-induced damage and modulates central and peripheral inflammatory activation in mice. Neuroscience. 2013 Jun 14;240:277-86. doi: 10.1016/j.neuroscience.2013.03.002. Epub 2013 Mar 14. PubMed PMID: 23500093; PubMed Central PMCID: PMC36378…	PUBMED	SCOPUS	SCIENCE DIRECT	NO
Labrador-Garrido A, Cejudo-Guillén M, Daturpalli S, Leal MM, Klippstein R, De Genst EJ, Villadiego J, Toledo-Aral JJ, Dobson CM, Jackson SE, Pozo D, Roodveldt C. Chaperome screening leads to identification of Grp94/Gp96 and FKBP4/52 as modulators of the α-synuclein-elicited immune response. FASEB J. 2016 Feb;30(2):564-77. doi: 10.1096/fj.15-275131. Epub 2015 Oct 6. PubMed PMID: 26443817.	PUBMED	SCOPUS	-	NO
Sommer A, Maxreiter F, Krach F, Fadler T, Grosch J, Maroni M, Graef D, Eberhardt E, Riemenschneider MJ, Yeo GW, Kohl Z, Xiang W, Gage FH, Winkler J, Prots I, Winner B. Th17 Lymphocytes Induce Neuronal Cell Death in a Human iPSC-Based Model of Parkinson's Disease. Cell Stem Cell. 2018 Jul 5;23(1):123-131.e6. doi: 10.1016/j.stem.2018.06.015. PubMed PMID: 29979986.	PUBMED	SCOPUS	-	INCLUDED
Bolte AC, Lukens JR. Th17 Cells in Parkinson's Disease: The Bane of the Midbrain. Cell Stem Cell. 2018 Jul 5;23(1):5-6. doi: 10.1016/j.stem.2018.06.016. PubMed PMID: 29979991.	PUBMED	SCOPUS	-	NO
Cen L, Yang C, Huang S, Zhou M, Tang X, Li K, Guo W, Wu Z, Mo M, Xiao Y, Chen X, Yang X, Huang Q, Chen C, Qu S, Xu P. Peripheral Lymphocyte Subsets as a Marker of Parkinson's Disease in a Chinese Population. Neurosci Bull. 2017 Oct;33(5):493-500. doi: 10.1007/s12264-017-0163-9. Epub 2017 Aug 8. PubMed PMID: 28791571; PubMed Central PMCID: PMC5636734.	PUBMED	SCOPUS	-	INCLUDED
Kustrimovic N, Comi C, Magistrelli L, Rasini E, Legnaro M, Bombelli R, Aleksic I, Blandini F, Minafra B, Riboldazzi G, Sturchio A, Mauri M, Bono G, Marino F, Cosentino M. Parkinson's disease patients have a complex phenotypic and functional Th1 bias: cross-sectional studies of CD4+ Th1/Th2/T17 and Treg in drug-naïve and drug-treated patients. J Neuroinflammation. 2018 Jul 12;15(1):205. doi: 10.11…	PUBMED	SCOPUS	-	INCLUDED
Baek H, Jang HI, Jeon HN, Bae H. Comparison of Administration Routes on the Protective Effects of Bee Venom Phospholipase A2 in a Mouse Model of Parkinson's Disease. Front Aging Neurosci. 2018 Jun 11;10:179. doi: 10.3389/fnagi.2018.00179. eCollection 2018. PubMed PMID: 29942256; PubMed Central PMCID: PMC6004420.	PUBMED	SCOPUS	-	NO
Ankeny, D. P., & Popovich, P. G. (2010). B cells and autoantibodies: Complex roles in CNS injury. Trends in Immunology, 31(9), 332-338. doi:10.1016/j.it.2010.06.006	-	SCOPUS	SCIENCE DIRECT	NO
Appel, S. H. (2009). CD4+ T cells mediate cytotoxicity in neurodegenerative diseases. Journal of Clinical Investigation, 119(1), 13-15. doi:10.1172/JCI38096	-	SCOPUS	-	NO
D'Amato, M. (2013). Genes and functional GI disorders: From casual to causal relationship. Neurogastroenterology and Motility, 25(8), 638-649. doi:10.1111/nmo.12173	-	SCOPUS	-	NO
Fakhoury, M. (2016). Immune-mediated processes in neurodegeneration: Where do we stand? Journal of Neurology, 263(9), 1683-1701. doi:10.1007/s00415-016-8052-0	-	SCOPUS	-	NO
Filippini, P., Cesario, A., Fini, M., Locatelli, F., & Rutella, S. (2012). The yin and yang of non-neuronal α7-nicotinic receptors in inflammation and autoimmunity. Current Drug Targets, 13(5), 644-655. Retrieved from www.scopus.com	-	SCOPUS	-	NO
Ha, D., Stone, D. K., Mosley, R. L., & Gendelman, H. E. (2012). Immunization strategies for parkinson's disease. Parkinsonism and Related Disorders, 18(SUPPL. 1), S218-S221. Retrieved from www.scopus.com	-	SCOPUS	SCIENCE DIRECT	NO
Hagberg, H., Gressens, P., & Mallard, C. (2012). Inflammation during fetal and neonatal life: Implications for neurologic and neuropsychiatric disease in children and adults. Annals of Neurology, 71(4), 444-457. doi:10.1002/ana.22620	-	SCOPUS	-	NO
Kielian, T. (2016). Multifaceted roles of neuroinflammation: The need to consider both sides of the coin. Journal of Neurochemistry, 136, 5-9. doi:10.1111/jnc.13530	-	SCOPUS	-	NO
Kingwell, K. (2010). Multiple sclerosis: Putting a dampener on inflammation. Nature Reviews Neuroscience, 11(9) doi:10.1038/nrn2903	-	SCOPUS	-	NO
Liang, Z., Zhao, Y., Ruan, L., Zhu, L., Jin, K., Zhuge, Q., . . . Zhao, Y. (2017). Impact of aging immune system on neurodegeneration and potential immunotherapies. Progress in Neurobiology, 157, 2-28. doi:10.1016/j.pneurobio.2017.07.006	-	SCOPUS	SCIENCE DIRECT	NO
Liblau, R. S., Gonzalez-Dunia, D., Wiendl, H., & Zipp, F. (2013). Neurons as targets for T cells in the nervous system. Trends in Neurosciences, 36(6), 315-324. doi:10.1016/j.tins.2013.01.008	-	SCOPUS	SCIENCE DIRECT	NO
Lynch, M. A., & Mills, K. H. G. (2012). Immunology meets neuroscience - opportunities for immune intervention in neurodegenerative diseases. Brain, Behavior, and Immunity, 26(1), 1-10. doi:10.1016/j.bbi.2011.05.013	-	SCOPUS	SCIENCE DIRECT	NO
Matsuyama, T., Kawano, M., Takagi, R., Nakagome, K., Chikamatsu, K., & Matsushita, S. (2018). Interleukin-8 produced by T cells is under the control of dopamine signaling. Clinical and Experimental Neuroimmunology, doi:10.1111/cen3.12472	-	SCOPUS	-	NO
Miller, R. L., & Peden, D. B. (2014). Environmental effects on immune responses in patients with atopy and asthma. Journal of Allergy and Clinical Immunology, 134(5), 1001-1008. doi:10.1016/j.jaci.2014.07.064	-	SCOPUS	-	NO
Morris, G., Berk, M., Walder, K., & Maes, M. (2015). Central pathways causing fatigue in neuro-inflammatory and autoimmune illnesses. BMC Medicine, 13(1) doi:10.1186/s12916-014-0259-2	-	SCOPUS	-	NO
Mosley, R. L., & Gendelman, H. E. (2017). T cells and parkinson's disease. The Lancet Neurology, 16(10), 769-771. doi:10.1016/S1474-4422(17)30276-4	-	SCOPUS	-	NO
Nakagome, K., Matsushita, S., & Nagata, M. (2012). Neutrophilic inflammation in severe asthma. International Archives of Allergy and Immunology, 158(SUPPL. 1), 96-102. doi:10.1159/000337801	-	SCOPUS	-	NO
Nataf, S. (2017). Autoimmunity as a driving force of cognitive evolution. Frontiers in Neuroscience, 11(OCT) doi:10.3389/fnins.2017.00582	-	SCOPUS	-	NO
Niranjan, R. (2018). Recent advances in the mechanisms of neuroinflammation and their roles in neurodegeneration. Neurochemistry International, 120, 13-20. doi:10.1016/j.neuint.2018.07.003	-	SCOPUS	SCIENCE DIRECT	NO
Pacheco, R. (2017). Targeting dopamine receptor D3 signalling in inflammation. Oncotarget, 8(5), 7224-7225. doi:10.18632/oncotarget.14601	-	SCOPUS	-	NO
Ransohoff, R. M., & Perry, V. H. (2009). Microglial physiology: Unique stimuli, specialized responses doi:10.1146/annurev.immunol.021908.132528 Retrieved from www.scopus.com	-	SCOPUS	-	NO
Saijo, K., & Glass, C. K. (2011). Microglial cell origin and phenotypes in health and disease. Nature Reviews Immunology, 11(11), 775-787. doi:10.1038/nri3086	-	SCOPUS	-	NO
Samsam, M. (2010). Role of inflammation in neurological and psychiatric disorders. Anti-Inflammatory and Anti-Allergy Agents in Medicinal Chemistry, 9(3), 166-169. Retrieved from www.scopus.com	-	SCOPUS	-	NO
Savio, L. E. B., Mello, P. A., da Silva, C. G., & Coutinho-Silva, R. (2018). The P2X7 receptor in inflammatory diseases: Angel or demon? Frontiers in Pharmacology, 9(FEB) doi:10.3389/fphar.2018.00052	-	SCOPUS	-	NO
Solleiro-Villavicencio, H., & Rivas-Arancibia, S. (2018). Effect of chronic oxidative stress on neuroinflammatory response mediated by CD4+T cells in neurodegenerative diseases. Frontiers in Cellular Neuroscience, 12doi:10.3389/fncel.2018.00114	-	SCOPUS	-	NO
Sommer, A., Winner, B., & Prots, I. (2017). The trojan horse - neuroinflammatory impact of T cells in neurodegenerative diseases. Molecular Neurodegeneration, 12(1) doi:10.1186/s13024-017-0222-8	-	SCOPUS	-	NO
Tóth, B. E., Vecsernyés, M., Zelles, T., Kádár, K., & Nagy, G. M. (2012). Role of peripheral and brain-derived dopamine (DA) in immune regulation. Advances in Neuroimmune Biology, 3(2), 111-155. doi:10.3233/NIB-2012-012044	-	SCOPUS	-	NO
Trettel, F., Di Angelantonio, S., Limatola, C., & Ransohoff, R. M. (2010). Chemokines and chemokine receptors in the nervous system rome, 24/25 october, 2009, 2nd workshop. Journal of Neuroimmunology, 224(1-2), 1-7. doi:10.1016/j.jneuroim.2010.05.001	-	SCOPUS	-	NO
Waschek, J. A. (2013). VIP and PACAP: Neuropeptide modulators of CNS inflammation, injury, and repair. British Journal of Pharmacology, 169(3), 512-523. doi:10.1111/bph.12181	-	SCOPUS	-	NO
Yang, F., Li, B., Li, L., & Zhang, H. (2016). The clinical significance of the imbalance of Th17 and treg cells and their related cytokines in peripheral blood of Parkinson’s disease patients. International Journal of Clinical and Experimental Medicine, 9(9), 17946-17951. Retrieved from www.scopus.com	-	SCOPUS	-	INCLUDED
Yang, Y., Jiang, S., Yan, J., Li, Y., Xin, Z., Lin, Y., & Qu, Y. (2015). An overview of the molecular mechanisms and novel roles of Nrf2 in neurodegenerative disorders. Cytokine and Growth Factor Reviews, 26(1), 47-57. doi:10.1016/j.cytogfr.2014.09.002	-	SCOPUS	-	NO
Zealley, B., & De Grey, A. D. N. J. (2013). Commentary on some recent theses relevant to combating aging: December 2013. Rejuvenation Research, 16(6), 529-534. doi:10.1089/rej.2013.1533	-	SCOPUS	-	NO
Zhang, H., Wu, L. -., & Wu, J. (2011). Cross-talk between apolipoprotein e and cytokines. Mediators of Inflammation, 2011 doi:10.1155/2011/949072	-	SCOPUS	-	NO
R. Tavares, Isadora C.B. Pavan, Camila L. Amaral, Letícia Meneguello, Augusto D. Luchessi, Fernando M. Simabuco, The S6K protein family in health and disease, Life Sciences, Volume 131, 2015,	-	-	SCIENCE DIRECT	NO
V. Sanchez-Guajardo, N. Tentillier, M. Romero-Ramos, The relation between α-synuclein and microglia in Parkinson’s disease: Recent developments, Neuroscience, Volume 302, 2015,	-	-	SCIENCE DIRECT	NO
Jinlong Jian, Guangfei Li, Aubryanna Hettinghouse, Chuanju Liu, Progranulin: A key player in autoimmune diseases, Cytokine,Volume 101,2018,	-	-	SCIENCE DIRECT	NO
Manoj K. Pandey, Gregory A. Grabowski, Jörg Köhl, An unexpected player in Gaucher disease: The multiple roles of complement in disease development, Seminars in Immunology, Volume 37, 2018,	-	-	SCIENCE DIRECT	NO
Eva Bagyinszky, Vo Van Giau, Kyuhwan Shim, Kyoungho Suk, Seong Soo A. An, SangYun Kim, Role of inflammatory molecules in the Alzheimer's disease progression and diagnosis, Journal of the Neurological Sciences, Volume 376, 2017,	-	-	SCIENCE DIRECT	NO
N. Gorlé, C. Blaecher, E. Bauwens, C. Vandendriessche, S. Balusu, J. Vandewalle, C. Van Cauwenberghe, E. Van Wonterghem, G. Van Imschoot, C. Liu, R. Ducatelle, C. Libert, F. Haesebrouck, A. Smet, R.E. Vandenbroucke, The choroid plexus epithelium as a novel player in the stomach-brain axis during Helicobacter infection, Brain, Behavior, and Immunity,Volume 69, 2018,	-	-	SCIENCE DIRECT	NO
Fred D. Lublin, MS as a gateway disease, Journal of the Neurological Sciences, Volume 333, Issues 1–2, 2013,	-	-	SCIENCE DIRECT	NO
Nancy Maurya, Bharath Kumar Velmurugan, Therapeutic applications of cannabinoids, Chemico-Biological Interactions, Volume 293, 2018,	-	-	SCIENCE DIRECT	NO
Nicolas Weiss, Florence Miller, Sylvie Cazaubon, Pierre-Olivier Couraud, The blood-brain barrier in brain homeostasis and neurological diseases, Biochimica et Biophysica Acta (BBA) - Biomembranes, Volume 1788, Issue 4, 2009,	-	-	SCIENCE DIRECT	NO
Weimin Kong, Jui-Hung Yen, Doina Ganea, Docosahexaenoic acid prevents dendritic cell maturation, inhibits antigen-specific Th1/Th17 differentiation and suppresses experimental autoimmune encephalomyelitis, Brain, Behavior, and Immunity, Volume 25, Issue 5, 2011,	-	-	SCIENCE DIRECT	NO
Kuo-Hsuan Chang, Yih-Ru Wu, Yi-Chun Chen, Chiung-Mei Chen, Plasma inflammatory biomarkers for Huntington’s disease patients and mouse model, Brain, Behavior, and Immunity, Volume 44, 2015,	-	-	SCIENCE DIRECT	NO
Ebrahim Kouchaki, Reza Daneshvar Kakhaki, Omid Reza Tamtaji, Ehsan Dadgostar, Mohammad Behnam, Hassan Nikoueinejad, Hossein Akbari, Increased serum levels of TNF-α and decreased serum levels of IL-27 in patients with Parkinson disease and their correlation with disease severity, Clinical Neurology and Neurosurgery, Volume 166, 2018,	-	-	SCIENCE DIRECT	NO
Anastasiya Slyepchenko, Michael Maes, Cristiano A. Köhler, George Anderson, João Quevedo, Gilberto S. Alves, Michael Berk, Brisa S. Fernandes, André F. Carvalho, T helper 17 cells may drive neuroprogression in major depressive disorder: Proposal of an integrative model, Neuroscience & Biobehavioral Reviews, Volume 64, 2016,	-	-	SCIENCE DIRECT	NO
Ole-Morten Seternes, Andrew M. Kidger, Stephen M. Keyse, Dual-specificity MAP kinase phosphatases in health and disease, Biochimica et Biophysica Acta (BBA) - Molecular Cell Research, 2018,	-	-	SCIENCE DIRECT	NO
Femke Heindryckx, Jin-Ping Li, Role of proteoglycans in neuro-inflammation and central nervous system fibrosis, Matrix Biology, Volumes 68–69, 2018,	-	-	SCIENCE DIRECT	NO
Karamjeet Kaur, Jaskamal Singh Gill, Puneet Kumar Bansal, Rahul Deshmukh, Neuroinflammation - A major cause for striatal dopaminergic degeneration in Parkinson's disease, Journal of the Neurological Sciences, Volume 381, 2017,	-	-	SCIENCE DIRECT	NO
Francesco Girolamo, Cristiana Coppola, Domenico Ribatti, Immunoregulatory effect of mast cells influenced by microbes in neurodegenerative diseases, Brain, Behavior, and Immunity, Volume 65, 2017,	-	-	SCIENCE DIRECT	NO
Maria C.O. Rodrigues, Paul R. Sanberg, Luis Eduardo Cruz, Svitlana Garbuzova-Davis, The innate and adaptive immunological aspects in neurodegenerative diseases, Journal of Neuroimmunology, Volume 269, Issues 1–2, 2014,	-	-	SCIENCE DIRECT	NO
Hugo González, Daniela Elgueta, Andro Montoya, Rodrigo Pacheco, Neuroimmune regulation of microglial activity involved in neuroinflammation and neurodegenerative diseases, Journal of Neuroimmunology, Volume 274, Issues 1–2, 2014,	-	-	SCIENCE DIRECT	NO
Gosia Trynka, Cisca Wijmenga, David A. van Heel, A genetic perspective on coeliac disease, Trends in Molecular Medicine, Volume 16, Issue 11, 2010,	-	-	SCIENCE DIRECT	NO
David Goldeck, Walter Maetzler, Daniela Berg, Lilly Oettinger, Graham Pawelec, Altered dendritic cell subset distribution in patients with Parkinson's disease: Impact of CMV serostatus, Journal of Neuroimmunology, Volume 290, 2016,	-	-	SCIENCE DIRECT	NO
Caio Pupin Rosa, Gustavo Andrade Brancaglion, Tatimara M. Miyauchi-Tavares, Patrícia Paiva Corsetti, Leonardo Augusto de Almeida, Antibiotic-induced dysbiosis effects on the murine gastrointestinal tract and their systemic repercussions, Life Sciences, Volume 207, 2018,	-	-	SCIENCE DIRECT	NO
Eun Sook Chung, Himchan Kim, Gihyun Lee, Soojin Park, Hyunseong Kim, Hyunsu Bae, Neuro-protective effects of bee venom by suppression of neuroinflammatory responses in a mouse model of Parkinson’s disease: Role of regulatory T cells, Brain, Behavior, and Immunity, Volume 26, Issue 8, 2012,	-	-	SCIENCE DIRECT	NO
Zhi-Yin Lou, Jie Cheng, Xiao-Rong Wang, Yong-Fei Zhao, Jing Gan, Guo-Yu Zhou, Zhen-Guo Liu, Bao-Guo Xiao, The inhibition of CB1 receptor accelerates the onset and development of EAE possibly by regulating microglia/macrophages polarization, Journal of Neuroimmunology, Volume 317, 2018,	-	-	SCIENCE DIRECT	NO
Parvin Ataie-Kachoie, Mohammad H. Pourgholami, David L. Morris, Inhibition of the IL-6 signaling pathway: A strategy to combat chronic inflammatory diseases and cancer, Cytokine & Growth Factor Reviews, Volume 24, Issue 2, 2013,	-	-	SCIENCE DIRECT	NO
Cecilia Chavarría, José M. Souza Oxidation and nitration of α-synuclein and their implications in neurodegenerative diseases, Archives of Biochemistry and Biophysics, Volume 533, Issues 1–2, 2013,	-	-	SCIENCE DIRECT	NO
Rosaliana Libro, Placido Bramanti, Emanuela Mazzon, The role of the Wnt canonical signaling in neurodegenerative diseases, Life Sciences, Volume 158, 2016,	-	-	SCIENCE DIRECT	NO
Izaskun Buendia, Patrycja Michalska, Elisa Navarro, Isabel Gameiro, Javier Egea, Rafael León, Nrf2–ARE pathway: An emerging target against oxidative stress and neuroinflammation in neurodegenerative diseases, Pharmacology & Therapeutics, Volume 157, 2016,	-	-	SCIENCE DIRECT	NO
Lisa M. Kosloski, Elizabeth A. Kosmacek, Katherine E. Olson, R. Lee Mosley, Howard E. Gendelman, GM-CSF induces neuroprotective and anti-inflammatory responses in 1-methyl-4-phenyl-1,2,3,6-tetrahydropyridine intoxicated mice, Journal of Neuroimmunology, Volume 265, Issues 1–2, 2013,	-	-	SCIENCE DIRECT	NO
Rui Kang, Ruochan Chen, Qiuhong Zhang, Wen Hou, Sha Wu, Lizhi Cao, Jin Huang, Yan Yu, Xue-gong Fan, Zhengwen Yan, Xiaofang Sun, Haichao Wang, Qingde Wang, Allan Tsung, Timothy R. Billiar, Herbert J. Zeh, Michael T. Lotze, Daolin Tang, HMGB1 in health and disease, Molecular Aspects of Medicine, Volume 40, 2014,	-	-	SCIENCE DIRECT	NO
Anna Maria Malfitano, Giuseppe Marasco, Maria Chiara Proto, Chiara Laezza, Patrizia Gazzerro, Maurizio Bifulco Statins in neurological disorders: An overview and update, Pharmacological Research, Volume 88, 2014,	-	-	SCIENCE DIRECT	NO
Zhichun Chen, Shengdi Chen, Jun Liu, The role of T cells in the pathogenesis of Parkinson’s disease, Progress in Neurobiology, Volume 169, 2018,	-	-	SCIENCE DIRECT	NO
Seth L. Masters, Luke A.J. O’Neill Disease-associated amyloid and misfolded protein aggregates activate the inflammasome, Trends in Molecular Medicine, Volume 17, Issue 5, 2011,	-	-	SCIENCE DIRECT	NO
Antonia Cianciulli, Rosa Calvello, Chiara Porro, Teresa Trotta, Maria Antonietta Panaro, Understanding the role of SOCS signaling in neurodegenerative diseases: Current and emerging concepts, Cytokine & Growth Factor Reviews, Volume 37, 2017,	-	-	SCIENCE DIRECT	NO
Phillip Mackie, Joe Lebowitz, Leila Saadatpour, Emily Nickoloff, Peter Gaskill, Habibeh Khoshbouei, The dopamine transporter: An unrecognized nexus for dysfunctional peripheral immunity and signaling in Parkinson’s Disease, Brain, Behavior, and Immunity, Volume 70, 2018,	-	-	SCIENCE DIRECT	NO
André M. Mueller, Xiomara Pedré, Stephan Killian, Monique David, Andreas Steinbrecher, The Decoy Receptor 3 (DcR3, TNFRSF6B) suppresses Th17 immune responses and is abundant in human cerebrospinal fluid, Journal of Neuroimmunology, Volume 209, Issues 1–2,2009,	-	-	SCIENCE DIRECT	NO
Biswanath Dinda, Subhajit Dinda, Saikat DasSharma, Rajarshi Banik, Ankita Chakraborty, Manikarna Dinda, Therapeutic potentials of baicalin and its aglycone, baicalein against inflammatory disorders, European Journal of Medicinal Chemistry, Volume 131, 2017,	-	-	SCIENCE DIRECT	NO
Mark D. Turner, Belinda Nedjai, Tara Hurst, Daniel J. Pennington, Cytokines and chemokines: At the crossroads of cell signalling and inflammatory disease, Biochimica et Biophysica Acta (BBA) - Molecular Cell Research, Volume 1843, Issue 11, 2014,	-	-	SCIENCE DIRECT	NO
Claudio Procaccini, Marianna Santopaolo, Deriggio Faicchia, Alessandra Colamatteo, Luigi Formisano, Paola de Candia, Mario Galgani, Veronica De Rosa, Giuseppe Matarese Role of metabolism in neurodegenerative disorders, Metabolism, Volume 65, Issue 9, 2016,	-	-	SCIENCE DIRECT	NO
Masaaki Murakami, Masaya Harada, Daisuke Kamimura, Hideki Ogura, Yuko Okuyama, Noriko Kumai, Azusa Okuyama, Rajeev Singh, Jing-Jing Jiang, Toru Atsumi, Sayaka Shiraya, Yuji Nakatsuji, Makoto Kinoshita, Hitoshi Kohsaka, Makoto Nishida, Saburo Sakoda, Nobuyuki Miyasaka, Keiko Yamaguchi-Takihara, Toshio Hirano, Disease-Association Analysis of an Inflammation-Related Feedback Loop, Cell Reports, Volu…	-	-	SCIENCE DIRECT	NO
Stanley H. Appel, David R. Beers, Jenny S. Henkel T cell-microglial dialogue in Parkinson's disease and amyotrophic lateral sclerosis: are we listening?, Trends in Immunology, Volume 31, Issue 1, 2010,	-	-	SCIENCE DIRECT	NO
Xiaodong Chen, Shijia Wang, Wei Cao, Mesenchymal stem cell-mediated immunomodulation in cell therapy of neurodegenerative diseases, Cellular Immunology, Volume 326, 2018,	-	-	SCIENCE DIRECT	NO
Gerwyn Morris, Ken Walder, André F. Carvalho, Susannah J. Tye, Kurt Lucas, Michael Berk, Michael Maes, The role of hypernitrosylation in the pathogenesis and pathophysiology of neuroprogressive diseases, Neuroscience & Biobehavioral Reviews, Volume 84, 2018,	-	-	SCIENCE DIRECT	NO
Niloufar Salimian, Maryam Peymani, Kamran Ghaedi, Mohammad Hossein Nasr Esfahani, Modulation in miR-200a/SIRT1axis is associated with apoptosis in MPP+-induced SH-SY5Y cells, Gene, Volume 674, 2018,	-	-	SCIENCE DIRECT	NO
Monica Molteni, Carlo Rossetti, Neurodegenerative diseases: The immunological perspective, Journal of Neuroimmunology, Volume 313, 2017,	-	-	SCIENCE DIRECT	NO
Lin Xie, Xiao-Kang Li, Shiro Takahara, Curcumin has bright prospects for the treatment of multiple sclerosis, International Immunopharmacology, Volume 11, Issue 3, 2011,	-	-	SCIENCE DIRECT	NO
Maša Umićević Mirkov, Bram Verstockt, Isabelle Cleynen, Genetics of inflammatory bowel disease: beyond NOD2, The Lancet Gastroenterology & Hepatology, Volume 2, Issue 3, 2017,	-	-	SCIENCE DIRECT	NO
Mingyuan Liu, Lin Xiao, Shuxun Liu, Yiping Hu, Jun Tian, Guoqiang Gao, Shanshan Xie, Yangtai Guan, Immunoregulation of myelin-specific CD4+ T cell response by neural stem/progenitor cells: Role of prostaglandin E2, Journal of Neuroimmunology, Volume 255, Issues 1–2, 2013,	-	-	SCIENCE DIRECT	NO
Eleonore Beurel, Steven F. Grieco, Richard S. Jope, Glycogen synthase kinase-3 (GSK3): Regulation, actions, and diseases, Pharmacology & Therapeutics, Volume 148, 2015,	-	-	SCIENCE DIRECT	NO
Vincent C. Lombardi, Kenny L. De Meirleir, Krishnamurthy Subramanian, Sam M. Nourani, Ruben K. Dagda, Shannon L. Delaney, András Palotás, Nutritional modulation of the intestinal microbiota; future opportunities for the prevention and treatment of neuroimmune and neuroinflammatory disease, The Journal of Nutritional Biochemistry, Volume 61, 2018,	-	-	SCIENCE DIRECT	NO
William Abramovits, Marcial Oquendo, Introduction to Autoinflammatory Syndromes and Diseases, Dermatologic Clinics, Volume 31, Issue 3, 2013,	-	-	SCIENCE DIRECT	NO
Ping-Chang Kuo, Dennis A. Brown, Barbara A. Scofield, Hallel C. Paraiso, Pei-Yu Wang, I-Chen Yu, Jui-Hung Yen, Dithiolethione ACDT suppresses neuroinflammation and ameliorates disease severity in experimental autoimmune encephalomyelitis, Brain, Behavior, and Immunity, Volume 70, 2018,	-	-	SCIENCE DIRECT	NO
Zhaoqi Yan, Sara A. Gibson, Jessica A. Buckley, Hongwei Qin, Etty N. Benveniste, Role of the JAK/STAT signaling pathway in regulation of innate immunity in neuroinflammatory diseases, Clinical Immunology, Volume 189, 2018,	-	-	SCIENCE DIRECT	NO
Michal Schwartz, Aleksandra Deczkowska, Neurological Disease as a Failure of Brain–Immune Crosstalk: The Multiple Faces of Neuroinflammation, Trends in Immunology, Volume 37, Issue 10, 2016,	-	-	SCIENCE DIRECT	NO
Sanam Dolati, Majid Ahmadi, Reza Rikhtegar, Zohreh Babaloo, Hormoz Ayromlou, Leili Aghebati-Maleki, Mohammad Nouri, Mehdi Yousefi, Changes in Th17 cells function after nanocurcumin use to treat multiple sclerosis, International Immunopharmacology, Volume 61, 2018,	-	-	SCIENCE DIRECT	NO
Meghana N. Patel, Richard G. Carroll, Silvia Galván-Peña, Evanna L. Mills, Robin Olden, Martha Triantafilou, Amaya I. Wolf, Clare E. Bryant, Kathy Triantafilou, Seth L. Masters, Inflammasome Priming in Sterile Inflammatory Disease, Trends in Molecular Medicine, Volume 23, Issue 2, 2017,	-	-	SCIENCE DIRECT	NO
Hsien-Yi Chiu, Ting-Shun Wang, Po-Hua Chen, Shao-Hsuan Hsu, Ya-Chu Tsai, Tsen-Fang Tsai, Psoriasis in Taiwan: From epidemiology to new treatments, Dermatologica Sinica, Volume 36, Issue 3, 2018,	-	-	SCIENCE DIRECT	NO
Weimin Kong, Kirsten M. Hooper, Doina Ganea, The natural dual cyclooxygenase and 5-lipoxygenase inhibitor flavocoxid is protective in EAE through effects on Th1/Th17 differentiation and macrophage/microglia activation, Brain, Behavior, and Immunity, Volume 53, 2016,	-	-	SCIENCE DIRECT	NO
Teresa Trotta, Chiara Porro, Rosa Calvello, Maria Antonietta Panaro, Biological role of Toll-like receptor-4 in the brain, Journal of Neuroimmunology, Volume 268, Issues 1–2, 2014,	-	-	SCIENCE DIRECT	NO
Jueqiong Wang, Congying Zhao, Peng Kong, Guanyun Bian, Zhe Sun, Yafei Sun, Li Guo, Bin Li, Methylene blue alleviates experimental autoimmune encephalomyelitis by modulating AMPK/SIRT1 signaling pathway and Th17/Treg immune response, Journal of Neuroimmunology, Volume 299, 2016,	-	-	SCIENCE DIRECT	NO
Anat Shemer, Daniel Erny, Steffen Jung, Marco Prinz, Microglia Plasticity During Health and Disease: An Immunological Perspective, Trends in Immunology, Volume 36, Issue 10, 2015,	-	-	SCIENCE DIRECT	NO
Delinda A. Johnson, Jeffrey A. Johnson, Nrf2—a therapeutic target for the treatment of neurodegenerative diseases, Free Radical Biology and Medicine, Volume 88, Part B, 2015,	-	-	SCIENCE DIRECT	NO
Elisabetta Vegeto, Valeria Benedusi, Adriana Maggi, Estrogen anti-inflammatory activity in brain: A therapeutic opportunity for menopause and neurodegenerative diseases, Frontiers in Neuroendocrinology, Volume 29, Issue 4, 2008,	-	-	SCIENCE DIRECT	NO
Mathilde J.H. Girard-Madoux, Mercedes Gomez de Agüero, Stephanie C. Ganal-Vonarburg, Catherine Mooser, Gabrielle T. Belz, Andrew J. Macpherson, Eric Vivier, The immunological functions of the Appendix: An example of redundancy?, Seminars in Immunology, Volume 36, 2018,	-	-	SCIENCE DIRECT	NO
Peter Ludewig, Mattia Gallizioli, Xabier Urra, Sarah Behr, Vanessa H. Brait, Mathias Gelderblom, Tim Magnus, Anna M. Planas, Dendritic cells in brain diseases, Biochimica et Biophysica Acta (BBA) - Molecular Basis of Disease, Volume 1862, Issue 3, 2016,	-	-	SCIENCE DIRECT	NO
Gregor Jezernik, Uroš Potočnik, Comprehensive genetic study of fatty acids helps explain the role of noncoding inflammatory bowel disease associated SNPs and fatty acid metabolism in disease pathogenesis, Prostaglandins, Leukotrienes and Essential Fatty Acids, Volume 130, 2018,	-	-	SCIENCE DIRECT	NO
Louise M. Collins, André Toulouse, Thomas J. Connor, Yvonne M. Nolan, Contributions of central and systemic inflammation to the pathophysiology of Parkinson's disease, Neuropharmacology, Volume 62, Issue 7, 2012,	-	-	SCIENCE DIRECT	NO
Teodorico C. Ramalho, Alexandre A. de Castro, Tássia S. Tavares, Maria C. Silva, Daniela R. Silva, Pedro H. Cesar, Lucas A. Santos, Elaine F.F. da Cunha, Eugenie Nepovimova, Kamil Kuca, Insights into the pharmaceuticals and mechanisms of neurological orphan diseases: Current Status and future expectations, Progress in Neurobiology, Volume 169, 2018,	-	-	SCIENCE DIRECT	NO
Fernanda Marques, João Carlos Sousa, Maria Alexandra Brito, Jens Pahnke, Cecilia Santos, Margarida Correia-Neves, Joana Almeida Palha, The choroid plexus in health and in disease: dialogues into and out of the brain, Neurobiology of Disease, Volume 107, 2017,	-	-	SCIENCE DIRECT	NO
Katherine E Olson, Howard E Gendelman, Immunomodulation as a neuroprotective and therapeutic strategy for Parkinson's disease, Current Opinion in Pharmacology, Volume 26, 2016,	-	-	SCIENCE DIRECT	NO
Sanghamitra Bandyopadhyay, Jack T. Rogers, Alzheimer's disease therapeutics targeted to the control of amyloid precursor protein translation: Maintenance of brain iron homeostasis, Biochemical Pharmacology, Volume 88, Issue 4, 2014,	-	-	SCIENCE DIRECT	NO
Bin Han, Xiuping Li, Junwei Hao, The cholinergic anti-inflammatory pathway: An innovative treatment strategy for neurological diseases, Neuroscience & Biobehavioral Reviews, Volume 77, 2017,	-	-	SCIENCE DIRECT	NO
Bao-Liang Sun, Li-hua Wang, Tuo Yang, Jing-yi Sun, Lei-lei Mao, Ming-feng Yang, Hui Yuan, Robert A. Colvin, Xiao-yi Yang, Lymphatic drainage system of the brain: A novel target for intervention of neurological diseases, Progress in Neurobiology, Volumes 163–164, 2018,	-	-	SCIENCE DIRECT	NO
Haozhe Li, Qinting Zhang, Ningning Li, Fan Wang, Hui Xiang, Zongfeng Zhang, Yousong Su, Yueqi Huang, Shengyu Zhang, Guoqing Zhao, Rubai Zhou, Ling Mao, Zhiguang Lin, Weixiong Cai, Yiru Fang, Bin Xie, Min Zhao, Wu Hong, Plasma levels of Th17-related cytokines and complement C3 correlated with aggressive behavior in patients with schizophrenia, Psychiatry Research, Volume 246, 2016,	-	-	SCIENCE DIRECT	NO
Filip Van Hauwermeiren, Roosmarijn E. Vandenbroucke, Claude Libert, Treatment of TNF mediated diseases by selective inhibition of soluble TNF or TNFR1, Cytokine & Growth Factor Reviews, Volume 22, Issues 5–6, 2011,	-	-	SCIENCE DIRECT	NO
B. García Bueno, J.R. Caso, J.L.M. Madrigal, J.C. Leza, Innate immune receptor Toll-like receptor 4 signalling in neuropsychiatric diseases, Neuroscience & Biobehavioral Reviews, Volume 64, 2016,	-	-	SCIENCE DIRECT	NO
Sabrina Giacoppo, Maria Galuppo, Sabine Montaut, Renato Iori, Patrick Rollin, Placido Bramanti, Emanuela Mazzon, An overview on neuroprotective effects of isothiocyanates for the treatment of neurodegenerative diseases, Fitoterapia, Volume 106, 2015,	-	-	SCIENCE DIRECT	NO
Jana S. Burchfield, Qingtian Li, Helen Y. Wang, Rong-Fu Wang, JMJD3 as an epigenetic regulator in development and disease, The International Journal of Biochemistry & Cell Biology, Volume 67, 2015,	-	-	SCIENCE DIRECT	NO
Zimu Zhang, Rongxin Zhang, Epigenetics in autoimmune diseases: Pathogenesis and prospects for therapy, Autoimmunity Reviews, Volume 14, Issue 10, 2015,	-	-	SCIENCE DIRECT	NO
William J. Griffiths, Jonas Abdel-Khalik, Eylan Yutuc, Alwena H. Morgan, Ian Gilmore, Thomas Hearn, Yuqin Wang, Cholesterolomics: An update, Analytical Biochemistry, Volume 524, 2017,	-	-	SCIENCE DIRECT	NO
Mona Dehhaghi, Fatemeh Mohammadipanah, Gilles J. Guillemin, Myxobacterial natural products: An under-valued source of products for drug discovery for neurological disorders, NeuroToxicology, Volume 66, 2018,	-	-	SCIENCE DIRECT	NO
Volker Siffrin, Helena Radbruch, Robert Glumm, Raluca Niesner, Magdalena Paterka, Josephine Herz, Tina Leuenberger, Sabrina M. Lehmann, Sarah Luenstedt, Jan Leo Rinnenthal, Gregor Laube, Hervé Luche, Seija Lehnardt, Hans-Joerg Fehling, Oliver Griesbeck, Frauke Zipp, In Vivo Imaging of Partially Reversible Th17 Cell-Induced Neuronal Dysfunction in the Course of Encephalomyelitis, Immunity, Volume …	-	-	SCIENCE DIRECT	NO
Valerio Chiurchiù, Mario van der Stelt, Diego Centonze, Mauro Maccarrone, The endocannabinoid system and its therapeutic exploitation in multiple sclerosis: Clues for other neuroinflammatory diseases, Progress in Neurobiology, Volume 160, 2018,	-	-	SCIENCE DIRECT	NO
Helcio Alvarenga-Filho, Priscila M. Sacramento, Thais B. Ferreira, Joana Hygino, Jorge Eduardo Canto Abreu, Sonia Regina Carvalho, Ana Cristina Wing, Regina Maria Papais Alvarenga, Cleonice A.M. Bento, Combined exercise training reduces fatigue and modulates the cytokine profile of T-cells from multiple sclerosis patients in response to neuromediators, Journal of Neuroimmunology, Volume 293, 2016,	-	-	SCIENCE DIRECT	NO
D.A. Fernandes de Abreu, D. Eyles, F. Féron, Vitamin D, a neuro-immunomodulator: Implications for neurodegenerative and autoimmune diseases, Psychoneuroendocrinology, Volume 34, Supplement 1, 2009,	-	-	SCIENCE DIRECT	NO
Christina Alves Peixoto, Wilma Helena de Oliveira, Shyrlene Meiry da Racho Araújo, Ana Karolina Santana Nunes, AMPK activation: Role in the signaling pathways of neuroinflammation and neurodegeneration, Experimental Neurology, Volume 298, Part A, 2017,	-	-	SCIENCE DIRECT	NO
Paola de Candia, Giuseppe Matarese, Leptin and ghrelin: Sewing metabolism onto neurodegeneration, Neuropharmacology, Volume 136, Part B, 2018,	-	-	SCIENCE DIRECT	NO
Anjali Pandey, Sarang Bani, Prabhu Dutt, Naresh Kumar Satti, Krishan Avtar Suri, Ghulam Nabi Qazi, Multifunctional neuroprotective effect of Withanone, a compound from Withania somnifera roots in alleviating cognitive dysfunction, Cytokine, Volume 102, 2018,	-	-	SCIENCE DIRECT	NO
S.T. Ngo, F.J. Steyn, P.A. McCombe, Gender differences in autoimmune disease, Frontiers in Neuroendocrinology, Volume 35, Issue 3, 2014,	-	-	SCIENCE DIRECT	NO
Silvia Gazzin, Libor Vitek, Jon Watchko, Steven M. Shapiro, Claudio Tiribelli, A Novel Perspective on the Biology of Bilirubin in Health and Disease, Trends in Molecular Medicine, Volume 22, Issue 9, 2016,	-	-	SCIENCE DIRECT	NO
L. Wei, C. Zhang, H.Y. Chen, Z.J. Zhang, Z.F. Ji, T. Yue, X.M. Dai, Q. Zhu, L.L. Ma, D.Y. He, L.D. Jiang, Dopamine receptor DR2 expression in B cells is negatively correlated with disease activity in rheumatoid arthritis patients, Immunobiology, Volume 220, Issue 3, 2015,	-	-	SCIENCE DIRECT	NO
Mushtaq A. Ansari, Ahmed Nadeem, Sabry M. Attia, Saleh A. Bakheet, Mohammad Raish, Sheikh F. Ahmad, Adenosine A2A receptor modulates neuroimmune function through Th17/retinoid-related orphan receptor gamma t (RORγt) signaling in a BTBR T+ Itpr3tf/J mouse model of autism, Cellular Signalling, Volume 36, 2017,	-	-	SCIENCE DIRECT	NO
Thanh-Huyen Tran, George Mattheolabakis, Hibah Aldawsari, Mansoor Amiji, Exosomes as nanocarriers for immunotherapy of cancer and inflammatory diseases, Clinical Immunology, Volume 160, Issue 1, 2015,	-	-	SCIENCE DIRECT	NO
Bibiana Bielekova, Michael R. Pranzatelli, Promise, Progress, and Pitfalls in the Search for Central Nervous System Biomarkers in Neuroimmunological Diseases: A Role for Cerebrospinal Fluid Immunophenotyping, Seminars in Pediatric Neurology, Volume 24, Issue 3, 2017,	-	-	SCIENCE DIRECT	NO
Sarah M. McCormick, Nicola M. Heller, Commentary: IL-4 and IL-13 receptors and signaling, Cytokine, Volume 75, Issue 1, 2015,	-	-	SCIENCE DIRECT	NO
Alessandra Pecorelli, Carlo Cervellati, Joussef Hayek, Giuseppe Valacchi, OxInflammation in Rett syndrome, The International Journal of Biochemistry & Cell Biology, Volume 81, Part B, 2016,	-	-	SCIENCE DIRECT	NO
Elise L. Ma, Allen D. Smith, Neemesh Desai, Lumei Cheung, Marie Hanscom, Bogdan A. Stoica, David J. Loane, Terez Shea-Donohue, Alan I. Faden, Bidirectional brain-gut interactions and chronic pathological changes after traumatic brain injury in mice, Brain, Behavior, and Immunity, Volume 66, 2017,	-	-	SCIENCE DIRECT	NO
Ahmed Nadeem, Sheikh F. Ahmad, Sabry M. Attia, Saleh A. Bakheet, Naif O. Al-Harbi, Laila Y. AL-Ayadhi, Activation of IL-17 receptor leads to increased oxidative inflammation in peripheral monocytes of autistic children, Brain, Behavior, and Immunity, Volume 67, 2018,	-	-	SCIENCE DIRECT	NO
Mark F. McCarty, Potential ghrelin-mediated benefits and risks of hydrogen water, Medical Hypotheses, Volume 84, Issue 4, 2015,	-	-	SCIENCE DIRECT	NO
Peter J. van den Elsen, Marja C.J.A. van Eggermond, Fabiola Puentes, Paul van der Valk, David Baker, Sandra Amor, The epigenetics of multiple sclerosis and other related disorders, Multiple Sclerosis and Related Disorders, Volume 3, Issue 2, 2014,	-	-	SCIENCE DIRECT	NO
Peng Guoping, Wu Wei, Liu Xiaoyan, He Fangping, Chen Zhongqin, Luo Benyan, Characteristics of the peripheral T cell immune response of patients at different stages of vascular cognitive impairment, Immunology Letters, Volume 168, Issue 1, 2015,	-	-	SCIENCE DIRECT	NO
Ernest S. Smith, Alan Jonason, Christine Reilly, Janaki Veeraraghavan, Terrence Fisher, Michael Doherty, Ekaterina Klimatcheva, Crystal Mallow, Chad Cornelius, John E. Leonard, Nicola Marchi, Damir Janigro, Azeb Tadesse Argaw, Trinh Pham, Jennifer Seils, Holm Bussler, Sebold Torno, Renee Kirk, Alan Howell, Elizabeth E. Evans, Mark Paris, William J. Bowers, Gareth John, Maurice Zauderer, SEMA4D co…	-	-	SCIENCE DIRECT	NO
Miguel A González-Gay, Eric L Matteson, Santos Castañeda, Polymyalgia rheumatica, The Lancet, Volume 390, Issue 10103, 2017,	-	-	SCIENCE DIRECT	NO
Anthony J. Bron, Cintia S. de Paiva, Sunil K. Chauhan, Stefano Bonini, Eric E. Gabison, Sandeep Jain, Erich Knop, Maria Markoulli, Yoko Ogawa, Victor Perez, Yuichi Uchino, Norihiko Yokoi, Driss Zoukhri, David A. Sullivan, TFOS DEWS II pathophysiology report, The Ocular Surface, Volume 15, Issue 3, 2017,	-	-	SCIENCE DIRECT	NO
Patompong Ungprasert, Karn Wijarnpreecha, Wisit Cheungpasitporn, Patients with schizophrenia have a higher risk of psoriasis: A systematic review and meta-analysis, Psychiatry Research, Volume 259, 2018,	-	-	SCIENCE DIRECT	NO
Hongjuan Shi, Xiaodong Hua, Delian Kong, Donald Stein, Fang Hua, Role of Toll-like receptor mediated signaling in traumatic brain injury, Neuropharmacology, 2018,	-	-	SCIENCE DIRECT	NO
L. Steinman, Why are prions and amyloid structures immune suppressive and other intriguing questions facing neuroimmunologists in the future, Revue Neurologique, Volume 170, Issue 10, 2014,	-	-	SCIENCE DIRECT	NO
Luca Peruzzotti-Jametti, Stefano Pluchino, Targeting Mitochondrial Metabolism in Neuroinflammation: Towards a Therapy for Progressive Multiple Sclerosis, Trends in Molecular Medicine, 2018,	-	-	SCIENCE DIRECT	NO
Clare Baecher-Allan, Belinda J. Kaskow, Howard L. Weiner, Multiple Sclerosis: Mechanisms and Immunotherapy, Neuron, Volume 97, Issue 4, 2018,	-	-	SCIENCE DIRECT	NO
Kaoru Saijo, Beate Winner, Christian T. Carson, Jana G. Collier, Leah Boyer, Michael G. Rosenfeld, Fred H. Gage, Christopher K. Glass, A Nurr1/CoREST Pathway in Microglia and Astrocytes Protects Dopaminergic Neurons from Inflammation-Induced Death, Cell, Volume 137, Issue 1, 2009,	-	-	SCIENCE DIRECT	NO
Omid Jazayeri, S. Mojtaba Daghighi, Farhad Rezaee, Lifestyle alters GUT-bacteria function: Linking immune response and host, Best Practice & Research Clinical Gastroenterology, Volume 31, Issue 6, 2017,	-	-	SCIENCE DIRECT	NO
Leonardo Astudillo, Nicole Therville, Céline Colacios, Bruno Ségui, Nathalie Andrieu-Abadie, Thierry Levade, Glucosylceramidases and malignancies in mammals, Biochimie, Volume 125, 2016,	-	-	SCIENCE DIRECT	NO
Laura de Godoy Rousseff Prado, Natalia Pessoa Rocha, Leonardo Cruz de Souza, Isabella Carolina Santos Bicalho, Rodrigo Santiago Gomez, Mauro Vidigal-Lopes, Nayara Felicidade Tomaz Braz, Érica Leandro Marciano Vieira, Antônio Lúcio Teixeira, Longitudinal assessment of clinical and inflammatory markers in patients with amyotrophic lateral sclerosis, Journal of the Neurological Sciences, 2018,	-	-	SCIENCE DIRECT	NO
Christopher K. Glass, Kaoru Saijo, Beate Winner, Maria Carolina Marchetto, Fred H. Gage, Mechanisms Underlying Inflammation in Neurodegeneration, Cell, Volume 140, Issue 6, 2010,	-	-	SCIENCE DIRECT	NO
Jillian C. Nissen, Kaitlyn K. Thompson, Brian L. West, Stella E. Tsirka, Csf1R inhibition attenuates experimental autoimmune encephalomyelitis and promotes recovery, Experimental Neurology, Volume 307, 2018,	-	-	SCIENCE DIRECT	NO
Stephanie M. Davis, Keith R. Pennypacker, The role of the leukemia inhibitory factor receptor in neuroprotective signaling, Pharmacology & Therapeutics, Volume 183, 2018,	-	-	SCIENCE DIRECT	NO
Hossein Khorramdelazad, Vahid Bagheri, Gholamhossein Hassanshahi, Masoud Zeinali, Alireza Vakilian, New insights into the role of stromal cell-derived factor 1 (SDF-1/CXCL12) in the pathophysiology of multiple sclerosis, Journal of Neuroimmunology, Volume 290, 2016,	-	-	SCIENCE DIRECT	NO
Stephen Safe, Un-Ho Jin, Benjamin Morpurgo, Ala Abudayyeh, Mandip Singh, Ronald B. Tjalkens, Nuclear receptor 4A (NR4A) family – orphans no more, The Journal of Steroid Biochemistry and Molecular Biology Volume 157, 2016,	-	-	SCIENCE DIRECT	NO
Ruinan Gu, Fali Zhang, Gang Chen, Chaojun Han, Jay Liu, Zhaoxiang Ren, Yi Zhu, John L. Waddington, Long Tai Zheng, Xuechu Zhen, Clk1 deficiency promotes neuroinflammation and subsequent dopaminergic cell death through regulation of microglial metabolic reprogramming, Brain, Behavior, and Immunity, Volume 60, 2017,	-	-	SCIENCE DIRECT	NO
Mrinmay Chakrabarti, Azizul Haque, Naren L. Banik, Prakash Nagarkatti, Mitzi Nagarkatti, Swapan K. Ray, Estrogen receptor agonists for attenuation of neuroinflammation and neurodegeneration, Brain Research Bulletin, Volume 109, 2014,	-	-	SCIENCE DIRECT	NO
Emily G. Severance, Faith B. Dickerson, Robert H. Yolken, Autoimmune phenotypes in schizophrenia reveal novel treatment targets, Pharmacology & Therapeutics,Volume 189, 2018,	-	-	SCIENCE DIRECT	NO
Maryam Ali Mohammadie Kojour, Somayeh Ebrahimi-Barough, Homa Mohseni Kouchesfehani, Hanieh Jalali, Mohammah Hosein Karbalaie Ebrahim, Oleic acid promotes the expression of neural markers in differentiated human endometrial stem cells, Journal of Chemical Neuroanatomy, Volume 79, 2017,	-	-	SCIENCE DIRECT	NO
Sivaram Pillarisetti, Ish Khanna, A multimodal disease modifying approach to treat neuropathic pain – inhibition of soluble epoxide hydrolase (sEH), Drug Discovery Today, Volume 20, Issue 11, 2015,	-	-	SCIENCE DIRECT	NO
Matin Khosravi-Largani, Parmida Pourvali-Talatappeh, Ali Mohammad Rousta, Maedeh Karimi-Kivi, Elahe Noroozi, Ali Mahjoob, Yasaman Asaadi, Alireza Shahmohammadi, Sarina Sadeghi, Shiva Shakeri, Kimiya Ghiyasvand, Masoumeh Tavakoli-Yaraki, A review on potential roles of vitamins in incidence, progression, and improvement of multiple sclerosis, eNeurologicalSci, Volume 10, 2018, Pages 37-44, ISSN 240…	-	-	SCIENCE DIRECT	NO
Xiuyan Huang, Ashley D. Reynolds, R. Lee Mosley, Howard E. Gendelman, CD 4+ T cells in the pathobiology of neurodegenerative disorders, Journal of Neuroimmunology, Volume 211, Issues 1–2, 2009,	-	-	SCIENCE DIRECT	NO
George Anderson, Linking the biological underpinnings of depression: Role of mitochondria interactions with melatonin, inflammation, sirtuins, tryptophan catabolites, DNA repair and oxidative and nitrosative stress, with consequences for classification and cognition, Progress in Neuro-Psychopharmacology and Biological Psychiatry, Volume 80, Part C, 2018,	-	-	SCIENCE DIRECT	NO
Smriti Ojha, Babita Kumar, A review on nanotechnology based innovations in diagnosis and treatment of multiple sclerosis, Journal of Cellular Immunotherapy, 2017,	-	-	SCIENCE DIRECT	NO
Seung Hyo Jung, Kyung Jong Won, Kang Pa Lee, Dong Hyun Lee, Suyeol Yu, Dong-Youb Lee, Eun-Hye Seo, Hyun Kang, Eun-Seok Park, Hyun-Joong Kim, Seung Hyun Lee, Bokyung Kim, DJ-1 protein regulates CD3+ T cell migration via overexpression of CXCR4 receptor, Atherosclerosis, Volume 235, Issue 2, 2014,	-	-	SCIENCE DIRECT	NO
Mengmeng Wu, Wanwen Zeng, Wenqiang Liu, Hairong Lv, Ting Chen, Rui Jiang Leveraging multiple gene networks to prioritize GWAS candidate genes via network representation learning Methods, Volume 145, 2018,	-	-	SCIENCE DIRECT	NO
Anouk Kaulmann, Torsten Bohn, Carotenoids, inflammation, and oxidative stress—implications of cellular signaling pathways and relation to chronic disease prevention, Nutrition Research, Volume 34, Issue 11, 2014,	-	-	SCIENCE DIRECT	NO
Lindsay M. Webb, Mireia Guerau-de-Arellano, Emerging Role for Methylation in Multiple Sclerosis: Beyond DNA, Trends in Molecular Medicine, Volume 23, Issue 6, 2017,	-	-	SCIENCE DIRECT	NO
Maria E. Hernandez, Jesus D. Rembao, Daniel Hernandez-Baltazar, Rosa A. Castillo-Rodriguez, Victor M. Tellez-Lopez, Yazmin M. Flores-Martinez, Carlos E. Orozco-Barrios, Hector A. Rubio, Aurora Sánchez-García, Jose Ayala-Davila, Martha L. Arango-Rodriguez, Lenin Pavón, Teresa Mejia-Castillo, Patricia Forgez, Daniel Martinez-Fong, Safety of the intravenous administration of neurotensin-polyplex nan…	-	-	SCIENCE DIRECT	NO
Gregory P. Owens, A Neuroprimer: Principles of Central Nervous System Immunity, Seminars in Pediatric Neurology, Volume 24, Issue 3, 2017,	-	-	SCIENCE DIRECT	NO
Veronica Murta, Carina C. Ferrari, Influence of Peripheral inflammation on the progression of multiple sclerosis: Evidence from the clinic and experimental animal models, Molecular and Cellular Neuroscience, Volume 53, 2013,	-	-	SCIENCE DIRECT	NO
Aletta D. Kraneveld, Anneke Rijnierse, Frans P. Nijkamp, Johan Garssen, Neuro-immune interactions in inflammatory bowel disease and irritable bowel syndrome: Future therapeutic targets, European Journal of Pharmacology, Volume 585, Issues 2–3, 2008,	-	-	SCIENCE DIRECT	NO
Kaoru Saijo, Jana G. Collier, Andrew C. Li, John A. Katzenellenbogen, Christopher K. Glass, An ADIOL-ERβ-CtBP Transrepression Pathway Negatively Regulates Microglia-Mediated Inflammation, Cell, Volume 145, Issue 4, 2011,	-	-	SCIENCE DIRECT	NO
Anil Kumar, Ekavali, Kanwaljit Chopra, Madhurima Mukherjee, Raghavender Pottabathini, Dinesh K. Dhull, Current knowledge and pharmacological profile of berberine: An update, European Journal of Pharmacology, Volume 761, 2015,	-	-	SCIENCE DIRECT	NO
Volker Brinkmann, Sphingosine 1-phosphate receptors in health and disease: Mechanistic insights from gene deletion studies and reverse pharmacology, Pharmacology & Therapeutics, Volume 115, Issue 1, 2007,	-	-	SCIENCE DIRECT	NO
Zhizhang Wang, Weijie Yin, Lizhen Zhu, Jia Li, Yikun Yao, Feifei Chen, Mengmeng Sun, Jiayuan Zhang, Nan Shen, Yan Song, Xing Chang, Iron Drives T Helper Cell Pathogenicity by Promoting RNA-Binding Protein PCBP1-Mediated Proinflammatory Cytokine Production, Immunity, Volume 49, Issue 1, 2018,	-	-	SCIENCE DIRECT	NO
S. Monteiro, S. Roque, F. Marques, M. Correia-Neves, J.J. Cerqueira, Brain interference: Revisiting the role of IFNγ in the central nervous system, Progress in Neurobiology, Volume 156, 2017,	-	-	SCIENCE DIRECT	NO
Samia S. Messeha, Najla O. Zarmouh, Patricia Mendonca, Malak G. Kolta, Karam F.A. Soliman, The attenuating effects of plumbagin on pro-inflammatory cytokine expression in LPS-activated BV-2 microglial cells, Journal of Neuroimmunology, Volume 313, 2017,	-	-	SCIENCE DIRECT	NO
Hartmut Wekerle, Brain Autoimmunity and Intestinal Microbiota: 100 Trillion Game Changers, Trends in Immunology, Volume 38, Issue 7, 2017,	-	-	SCIENCE DIRECT	NO
Samuel A. Burns, R. Lee Archer, Janet A. Chavis, Cameron A. Tull, Lori L. Hensley, Paul D. Drew, Mitoxantrone repression of astrocyte activation: Relevance to multiple sclerosis, Brain Research, Volume 1473, 2012,	-	-	SCIENCE DIRECT	NO
Aleksandra Deczkowska, Kuti Baruch, Michal Schwartz, Type I/II Interferon Balance in the Regulation of Brain Physiology and Pathology, Trends in Immunology, Volume 37, Issue 3, 2016,	-	-	SCIENCE DIRECT	NO
Berislav V. Zlokovic, The Blood-Brain Barrier in Health and Chronic Neurodegenerative Disorders, Neuron, Volume 57, Issue 2, 2008,	-	-	SCIENCE DIRECT	NO
L. Mestre, F.J. Carrillo-Salinas, M. Mecha, A. Feliú, C. Guaza, Gut microbiota, cannabinoid system and neuroimmune interactions: New perspectives in multiple sclerosis, Biochemical Pharmacology, 2018,	-	-	SCIENCE DIRECT	NO
Afshin Shameli, Wenbin Xiao, Yan Zheng, Susan Shyu, John Sumodi, Howard J. Meyerson, Clifford V. Harding, Robert W. Maitta, A critical role for alpha-synuclein in development and function of T lymphocytes, Immunobiology, Volume 221, Issue 2, 2016,	-	-	SCIENCE DIRECT	NO
Delphine Demeestere, Claude Libert, Roosmarijn E. Vandenbroucke, Clinical implications of leukocyte infiltration at the choroid plexus in (neuro)inflammatory disorders, Drug Discovery Today, Volume 20, Issue 8, 2015,	-	-	SCIENCE DIRECT	NO
Yan-hua Li, Jie-zhong Yu, Yan-le Xin, Ling Feng, Zhi Chai, Jian-chun Liu, Hong-zhen Zhang, Guang-Xian Zhang, Bao-guo Xiao, Cun-gen Ma, Protective effect of a novel Rho kinase inhibitor WAR–5 in experimental autoimmune encephalomyelitis by modulating inflammatory response and neurotrophic factors, Experimental and Molecular Pathology, Volume 99, Issue 2, 2015,	-	-	SCIENCE DIRECT	NO
Albeena Nisar, Nayeema Akhter, Gurudarshan Singh, Akbar Masood, Akhter Malik, Basharat Banday, Mohammed Afzal Zargar, Modulation of T-helper cytokines and inflammatory mediators by Atropa accuminata. Royle in adjuvant induced arthritic tissues, Journal of Ethnopharmacology, Volume 162, 2015,	-	-	SCIENCE DIRECT	NO
Lidia De Riccardis, Antonia Rizzello, Alessandra Ferramosca, Emanuela Urso, Francesca De Robertis, Antonio Danieli, Anna Maria Giudetti, Giorgio Trianni, Vincenzo Zara, Michele Maffia, Bioenergetics profile of CD4+ T cells in relapsing remitting multiple sclerosis subjects, Journal of Biotechnology, Volume 202, 2015,	-	-	SCIENCE DIRECT	NO
Yoshinobu Kariya, Yukiko Kariya, Toshie Saito, Shuhei Nishiyama, Takashi Honda, Keiko Tanaka, Mari Yoshida, Kazuo Fujihara, Yasuhiro Hashimoto, Increased cerebrospinal fluid osteopontin levels and its involvement in macrophage infiltration in neuromyelitis optica, BBA Clinical, Volume 3, 2015,	-	-	SCIENCE DIRECT	NO
Lidia Fernández-Paredes, Armanda Casrouge, Jérémie Decalf, Clara de Andrés, Luisa Maria Villar, Rebeca Pérez de Diego, Bárbara Alonso, José Carlos Álvarez Cermeño, Rafael Arroyo, Marta Tejera-Alhambra, Joaquín Navarro, Celia Oreja-Guevara, Margarita López Trascasa, Ansgar Seyfferth, Maria Angel García Martínez, Roberto Álvarez Lafuente, Matthew L. Albert, Silvia Sánchez-Ramón, Multimarker risk st…	-	-	SCIENCE DIRECT	NO
Eric Kuklinski, Penny A. Asbell, Sjogren's syndrome from the perspective of ophthalmology, Clinical Immunology, Volume 182, 2017,	-	-	SCIENCE DIRECT	NO
Peizhong Mao, P. Hemachandra Reddy, Is multiple sclerosis a mitochondrial disease?, Biochimica et Biophysica Acta (BBA) - Molecular Basis of Disease, Volume 1802, Issue 1, 2010,	-	-	SCIENCE DIRECT	NO
C. Jung, J.-P. Hugot, Inflammatory Bowel Diseases: the genetic revolution, Gastroentérologie Clinique et Biologique, Volume 33, Supplement 3, 2009, Pages S123-S130,	-	-	SCIENCE DIRECT	NO
Xiaonan Zhong, Yifan Zhou, Tingting Lu, Zhanhang Wang, Ling Fang, Lisheng Peng, Allan G. Kermode, Wei Qiu, Infections in neuromyelitis optica spectrum disorder, Journal of Clinical Neuroscience, Volume 47, 2018,	-	-	SCIENCE DIRECT	NO
Preeti J. Khandelwal, Alexander M. Herman, Charbel E.-H. Moussa, Inflammation in the early stages of neurodegenerative pathology, Journal of Neuroimmunology, Volume 238, Issues 1–2, 2011,	-	-	SCIENCE DIRECT	NO
Andreas Klos, Andrea J. Tenner, Kay-Ole Johswich, Rahasson R. Ager, Edimara S. Reis, Jörg Köhl, The role of the anaphylatoxins in health and disease, Molecular Immunology, Volume 46, Issue 14, 2009,	-	-	SCIENCE DIRECT	NO
Hiroki Masuda, Masahiro Mori, Tomohiko Uchida, Akiyuki Uzawa, Ryohei Ohtani, Satoshi Kuwabara, Soluble CD40 ligand contributes to blood–brain barrier breakdown and central nervous system inflammation in multiple sclerosis and neuromyelitis optica spectrum disorder, Journal of Neuroimmunology, Volume 305, 2017,	-	-	SCIENCE DIRECT	NO
Stephanie C. Tucker, Kenneth V. Honn, Emerging targets in lipid-based therapy, Biochemical Pharmacology, Volume 85, Issue 5, 2013, Pages 673-688, ISSN 0006-2952,	-	-	SCIENCE DIRECT	NO
Arpita S. Bharadwaj, Binoy Appukuttan, Phillip A. Wilmarth, Yuzhen Pan, Andrew J. Stempel, Timothy J. Chipps, Eric E. Benedetti, David O. Zamora, Dongseok Choi, Larry L. David, Justine R. Smith, Role of the retinal vascular endothelial cell in ocular disease, Progress in Retinal and Eye Research, Volume 32, 2013,	-	-	SCIENCE DIRECT	NO
Andrea Ebersberger, The analgesic potential of cytokine neutralization with biologicals, European Journal of Pharmacology, Volume 835, 2018,	-	-	SCIENCE DIRECT	NO
Xiaofeng Wen, Xiao Hu, Li Miao, Xiaofei Ge, Yuhua Deng, Paul W. Bible, Lai Wei, Epigenetics, microbiota, and intraocular inflammation: New paradigms of immune regulation in the eye, Progress in Retinal and Eye Research, Volume 64, 2018,	-	-	SCIENCE DIRECT	NO
Sheikh F. Ahmad, Mushtaq A. Ansari, Ahmed Nadeem, Saleh A. Bakheet, Mohammad Z. Alzahrani, Musaad A. Alshammari, Wael A. Alanazi, Abdullah F. Alasmari, Sabry M. Attia, Resveratrol attenuates pro-inflammatory cytokines and activation of JAK1-STAT3 in BTBR T+ Itpr3tf/J autistic mice, European Journal of Pharmacology, Volume 829, 2018,	-	-	SCIENCE DIRECT	NO
Hirokazu Hara, Dai Kimoto, Miho Kajita, Chisato Takada, Tetsuro Kamiya, Tetsuo Adachi, Apomorphine prevents LPS-induced IL-23 p19 mRNA expression via inhibition of JNK and ATF4 in HAPI cells, European Journal of Pharmacology, Volume 795, 2017,	-	-	SCIENCE DIRECT	NO
Cécile Braudeau, Julie Graveleau, Marie Rimbert, Antoine Néel, Mohamed Hamidou, Bernard Grosbois, Audrey Besançon, Stéphanie Giraudet, Caroline Terrien, Régis Josien, Agathe Masseau, Altered innate function of plasmacytoid dendritic cells restored by enzyme replacement therapy in Gaucher disease, Blood Cells, Molecules, and Diseases, Volume 50, Issue 4, 2013,	-	-	SCIENCE DIRECT	NO
Conor Mc Guire, Marco Prinz, Rudi Beyaert, Geert van Loo, Nuclear factor kappa B (NF-κB) in multiple sclerosis pathology, Trends in Molecular Medicine, Volume 19, Issue 10, 2013,	-	-	SCIENCE DIRECT	NO
Francesco Fazio, Martina Ulivieri, Claudia Volpi, Marco Gargaro, Francesca Fallarino, Targeting metabotropic glutamate receptors for the treatment of neuroinflammation, Current Opinion in Pharmacology, Volume 38, 2018,	-	-	SCIENCE DIRECT	NO
Nicola Principi, Susanna Esposito, Gut microbiota and central nervous system development, Journal of Infection, Volume 73, Issue 6, 2016,	-	-	SCIENCE DIRECT	NO
Hermona Soreq, Yochai Wolf, NeurimmiRs: microRNAs in the neuroimmune interface, Trends in Molecular Medicine, Volume 17, Issue 10, 2011,	-	-	SCIENCE DIRECT	NO
Erik Ellwardt, James T. Walsh, Jonathan Kipnis, Frauke Zipp, Understanding the Role of T Cells in CNS Homeostasis, Trends in Immunology, Volume 37, Issue 2, 2016,	-	-	SCIENCE DIRECT	NO
Erik Ellwardt, Frauke Zipp, Molecular mechanisms linking neuroinflammation and neurodegeneration in MS, Experimental Neurology, Volume 262, Part A, 2014,	-	-	SCIENCE DIRECT	NO
Laura Llorca Otero, Victoria E. Ruiz, Guillermo I. Perez Perez, Helicobacter pylori: The balance between a role as colonizer and pathogen, Best Practice & Research Clinical Gastroenterology, Volume 28, Issue 6, 2014,	-	-	SCIENCE DIRECT	NO
Shinsaku Imashuku, Robert J. Arceci, Strategies for the Prevention of Central Nervous System Complications in Patients with Langerhans Cell Histiocytosis: The Problem of Neurodegenerative Syndrome, Hematology/Oncology Clinics of North America, Volume 29, Issue 5, 2015,	-	-	SCIENCE DIRECT	NO
Maurizio Cutolo, Autoimmune polyendocrine syndromes, Autoimmunity Reviews, Volume 13, Issue 2, 2014, Pages 85-89,	-	-	SCIENCE DIRECT	NO
Linda Ottoboni, Donatella De Feo, Arianna Merlini, Gianvito Martino, Commonalities in immune modulation between mesenchymal stem cells (MSCs) and neural stem/precursor cells (NPCs), Immunology Letters, Volume 168, Issue 2, 2015,	-	-	SCIENCE DIRECT	NO
Cristiana Pistono, Cecilia Osera, Chiara Boiocchi, Giulia Mallucci, Mariaclara Cuccia, Roberto Bergamaschi, Alessia Pascale, What’s new about oral treatments in Multiple Sclerosis? Immunogenetics still under question, Pharmacological Research, Volume 120, 2017,	-	-	SCIENCE DIRECT	NO
Andrew R. Gennery, Physiology of immune competence, Paediatrics and Child Health, Volume 28, Issue 6, 2018,	-	-	SCIENCE DIRECT	NO
Zahra Gholamnezhad, Rana Keyhanmanesh, Mohammad Hossien Boskabady, Anti-inflammatory, antioxidant, and immunomodulatory aspects of Nigella sativa for its preventive and bronchodilatory effects on obstructive respiratory diseases: A review of basic and clinical evidence, Journal of Functional Foods, Volume 17, 2015,	-	-	SCIENCE DIRECT	NO
Richard S. Jope, Yuyan Cheng, Jeffrey A. Lowell, Ryan J. Worthen, Yoel H. Sitbon, Eleonore Beurel, Stressed and Inflamed, Can GSK3 Be Blamed?, Trends in Biochemical Sciences, Volume 42, Issue 3, 2017,	-	-	SCIENCE DIRECT	NO
Ulrich Mrowietz, Peter John Morrison, Ina Suhrkamp, Margaret Kumanova, Bernd Clement, The Pharmacokinetics of Fumaric Acid Esters Reveal Their In Vivo Effects, Trends in Pharmacological Sciences, Volume 39, Issue 1, 2018,	-	-	SCIENCE DIRECT	NO
M. Kerschensteiner, E. Meinl, R. Hohlfeld, Neuro-immune crosstalk in CNS diseases, Neuroscience, Volume 158, Issue 3, 2009,	-	-	SCIENCE DIRECT	NO
Anneleen Spooren, Krzysztof Kolmus, Guy Laureys, Ralph Clinckers, Jacques De Keyser, Guy Haegeman, Sarah Gerlo, Interleukin-6, a mental cytokine, Brain Research Reviews, Volume 67, Issues 1–2, 2011,	-	-	SCIENCE DIRECT	NO
Kira M. Holmström, Rumen V. Kostov, Albena T. Dinkova-Kostova, The multifaceted role of Nrf2 in mitochondrial function, Current Opinion in Toxicology, Volume 1, 2016,	-	-	SCIENCE DIRECT	NO
Adriano Zager, Jean Pierre Peron, Gregory Mennecier, Sandra C. Rodrigues, Thiago P. Aloia, João Palermo-Neto, Maternal immune activation in late gestation increases neuroinflammation and aggravates experimental autoimmune encephalomyelitis in the offspring, Brain, Behavior, and Immunity, Volume 43, 2015,	-	-	SCIENCE DIRECT	NO
Davide Ferrari, Nicoletta Bianchi, Holger K. Eltzschig, Roberto Gambari, MicroRNAs Modulate the Purinergic Signaling Network, Trends in Molecular Medicine, Volume 22, Issue 10, 2016,	-	-	SCIENCE DIRECT	NO
Kevin Manley, Weiguo Han, Grant Zelin, David A. Lawrence, Crosstalk between the immune, endocrine, and nervous systems in immunotoxicology, Current Opinion in Toxicology, Volume 10 2018,	-	-	SCIENCE DIRECT	NO
Jin Gyu Choi, Sun Yeou Kim, Minsun Jeong, Myung Sook Oh, Pharmacotherapeutic potential of ginger and its compounds in age-related neurological disorders, Pharmacology & Therapeutics, Volume 182, 2018,	-	-	SCIENCE DIRECT	NO
Sang-Chul Han, Dong-Hwan Koo, Na-Jin Kang, Weon-Jong Yoon, Gyeoung-Jin Kang, Hee-Kyoung Kang, Eun-Sook Yoo, Docosahexaenoic Acid Alleviates Atopic Dermatitis by Generating Tregs and IL-10/TGF-β-Modified Macrophages via a TGF-β-Dependent Mechanism, Journal of Investigative Dermatology, Volume 135, Issue 6, 2015,	-	-	SCIENCE DIRECT	NO
Khanna, M. Guo, M. Mehra, W. Royal, Inflammation and oxidative stress induced by cigarette smoke in Lewis rat brains, Journal of Neuroimmunology, Volume 254, Issues 1–2, 2013,	-	-	SCIENCE DIRECT	NO
Sabien van Neerven, Eric Kampmann, Jörg Mey, RAR/RXR and PPAR/RXR signaling in neurological and psychiatric diseases, Progress in Neurobiology, Volume 85, Issue 4, 2008,	-	-	SCIENCE DIRECT	NO
Ilona Kubajewska, Cris S. Constantinescu, Cannabinoids and experimental models of multiple sclerosis, Immunobiology, Volume 215, Issue 8, 2010,	-	-	SCIENCE DIRECT	NO
Min-Hsiung Pan, Yi-Shiou Chiou, Mei-Ling Tsai, Chi-Tang Ho, Anti-inflammatory activity of traditional Chinese medicinal herbs, Journal of Traditional and Complementary Medicine, Volume 1, Issue 1, 2011,	-	-	SCIENCE DIRECT	NO
Gabriela Bindea, Bernhard Mlecnik, Marie Tosolini, Amos Kirilovsky, Maximilian Waldner, Anna C. Obenauf, Helen Angell, Tessa Fredriksen, Lucie Lafontaine, Anne Berger, Patrick Bruneval, Wolf Herman Fridman, Christoph Becker, Franck Pagès, Michael R. Speicher, Zlatko Trajanoski, Jérôme Galon, Spatiotemporal Dynamics of Intratumoral Immune Cells Reveal the Immune Landscape in Human Cancer, Immunity…	-	-	SCIENCE DIRECT	NO
Maria Nikodemova, JangEun Lee, Zsuzsanna Fabry, Ian D. Duncan, Minocycline attenuates experimental autoimmune encephalomyelitis in rats by reducing T cell infiltration into the spinal cord, Journal of Neuroimmunology, Volume 219, Issues 1–2, 2010,	-	-	SCIENCE DIRECT	NO
Stefania Gessi, Stefania Merighi, Valeria Sacchetto, Carolina Simioni, Pier Andrea Borea, Adenosine receptors and cancer, Biochimica et Biophysica Acta (BBA) - Biomembranes, Volume 1808, Issue 5, 2011,	-	-	SCIENCE DIRECT	NO
F. Lühder, D.H. Lee, R. Gold, J. Stegbauer, R.A. Linker, Small but powerful: Short peptide hormones and their role in autoimmune inflammation, Journal of Neuroimmunology, Volume 217, Issues 1–2, 2009, Pages 1-7,	-	-	SCIENCE DIRECT	NO
W.S. Daniel Tan, Wupeng Liao, Shuo Zhou, W.S. Fred Wong, Is there a future for andrographolide to be an anti-inflammatory drug? Deciphering its major mechanisms of action, Biochemical Pharmacology, Volume 139, 2017,	-	-	SCIENCE DIRECT	NO
Sheikh F. Ahmad, Mushtaq A. Ansari, Ahmed Nadeem, Saleh A. Bakheet, Laila Yousef AL-Ayadhi, Sabry M. Attia, Toll-like receptors, NF-κB, and IL-27 mediate adenosine A2A receptor signaling in BTBR T+ Itpr3tf/J mice, Progress in Neuro-Psychopharmacology and Biological Psychiatry, Volume 79, Part B, 2017,	-	-	SCIENCE DIRECT	NO
Silvia Rossi, Giorgio Bernardi, Diego Centonze, The endocannabinoid system in the inflammatory and neurodegenerative processes of multiple sclerosis and of amyotrophic lateral sclerosis, Experimental Neurology, Volume 224, Issue 1, 2010,	-	-	SCIENCE DIRECT	NO
James S. Wolffsohn, Reiko Arita, Robin Chalmers, Ali Djalilian, Murat Dogru, Kathy Dumbleton, Preeya K. Gupta, Paul Karpecki, Sihem Lazreg, Heiko Pult, Benjamin D. Sullivan, Alan Tomlinson, Louis Tong, Edoardo Villani, Kyung Chul Yoon, Lyndon Jones, Jennifer P. Craig, TFOS DEWS II Diagnostic Methodology report, The Ocular Surface, Volume 15, Issue 3, 2017,	-	-	SCIENCE DIRECT	NO
Alessandra Fraternale, Maria Filomena Paoletti, Sabrina Dominici, Antonella Caputo, Arianna Castaldello, Enrico Millo, Egidio Brocca-Cofano, Michaël Smietana, Pascal Clayette, Joël Oiry, Umberto Benatti, Mauro Magnani, The increase in intra-macrophage thiols induced by new pro-GSH molecules directs the Th1 skewing in ovalbumin immunized mice, Vaccine, Volume 28, Issue 48, 2010,	-	-	SCIENCE DIRECT	NO
Leonardo Cavone, Alberto Chiarugi, Targeting poly(ADP-ribose) polymerase-1 as a promising approach for immunomodulation in multiple sclerosis?, Trends in Molecular Medicine, Volume 18, Issue 2, 2012,	-	-	SCIENCE DIRECT	NO
Orli Sagi, Arie Budovsky, Marina Wolfson, Vadim E. Fraifeld, ShcC proteins: Brain aging and beyond, Ageing Research Reviews, Volume 19, 2015,	-	-	SCIENCE DIRECT	NO
James A. Rogers, Luanne Metz, V. Wee Yong, Review: Endocrine disrupting chemicals and immune responses: A focus on bisphenol-A and its potential mechanisms, Molecular Immunology, Volume 53, Issue 4, 2013,	-	-	SCIENCE DIRECT	NO
Helena Slaets, Jerome J.A. Hendriks, Piet Stinissen, Trevor J. Kilpatrick, Niels Hellings, Therapeutic potential of LIF in multiple sclerosis, Trends in Molecular Medicine, Volume 16, Issue 11, 2010,	-	-	SCIENCE DIRECT	NO
Sheikh F. Ahmad, Ahmed Nadeem, Mushtaq A. Ansari, Saleh A. Bakheet, Sabry M. Attia, Khairy M.A. Zoheir, Laila Yousef AL-Ayadhi, Mohammad Z. Alzahrani, Abdulaziz M.S. Alsaad, Moureq R. Alotaibi, Adel R.A. Abd-Allah, Imbalance between the anti- and pro-inflammatory milieu in blood leukocytes of autistic children, Molecular Immunology, Volume 82, 2017,	-	-	SCIENCE DIRECT	NO
Margaret M. Harnett, Miguel A. Pineda, Perle Latré de Laté, Russell J. Eason, Sébastien Besteiro, William Harnett, Gordon Langsley, From Christian de Duve to Yoshinori Ohsumi: More to autophagy than just dining at home, Biomedical Journal, Volume 40, Issue 1, 2017,	-	-	SCIENCE DIRECT	NO
Lipeng Bai, Danting Li, Jie Li, Zhengzhong Luo, Shumin Yu, Suizhong Cao, Liuhong Shen, Zhicai Zuo, Xiaoping Ma, Bioactive molecules derived from umbilical cord mesenchymal stem cells, Acta Histochemica, Volume 118, Issue 8, 2016,	-	-	SCIENCE DIRECT	NO
Mads N. Olesen, Josefine R. Christiansen, Steen Vang Petersen, Poul Henning Jensen, Wojciech Paslawski, Marina Romero-Ramos, Vanesa Sanchez-Guajardo, CD4 T cells react to local increase of α-synuclein in a pathology-associated variant-dependent manner and modify brain microglia in absence of brain pathology, Heliyon, Volume 4, Issue 1, 2018,	-	-	SCIENCE DIRECT	NO
Aihua Zhang, Hui Sun, Guangli Yan, Weiping Cheng, Xijun Wang, Systems biology approach opens door to essence of acupuncture, Complementary Therapies in Medicine, Volume 21, Issue 3, 2013,	-	-	SCIENCE DIRECT	NO
C. Volpi, F. Fazio, F. Fallarino, Targeting metabotropic glutamate receptors in neuroimmune communication, Neuropharmacology, Volume 63, Issue 4, 2012,	-	-	SCIENCE DIRECT	NO
Fei Wu, Tao Luo, Yuanwu Mei, Huan Liu, Jihua Dong, Yuan Fang, Jun Peng, Yuanjin Guo, Simvastatin alters M1/M2 polarization of murine BV2 microglia via Notch signaling, Journal of Neuroimmunology, Volume 316, 2018,	-	-	SCIENCE DIRECT	NO
Monty Lyman, Dafydd G. Lloyd, Xunming Ji, Marcela P. Vizcaychipi, Daqing Ma, Neuroinflammation: The role and consequences, Neuroscience Research, Volume 79, 2014,	-	-	SCIENCE DIRECT	NO
Christian Siebold, Toshihide Yamashita, Philippe P. Monnier, Bernhard K. Mueller, R. Jeroen Pasterkamp, RGMs: Structural Insights, Molecular Regulation, and Downstream Signaling, Trends in Cell Biology, Volume 27, Issue 5, 2017,	-	-	SCIENCE DIRECT	NO
Juan M. Saavedra, Enrique Sánchez-Lemus, Julius Benicky, Blockade of brain angiotensin II AT1 receptors ameliorates stress, anxiety, brain inflammation and ischemia: Therapeutic implications, Psychoneuroendocrinology, Volume 36, Issue 1, 2011,	-	-	SCIENCE DIRECT	NO
John P. Dalton, Mark W. Robinson, Grace Mulcahy, Sandra M. O’Neill, Sheila Donnelly, Immunomodulatory molecules of Fasciola hepatica: Candidates for both vaccine and immunotherapeutic development, Veterinary Parasitology, Volume 195, Issues 3–4, 2013,	-	-	SCIENCE DIRECT	NO
Francesco Fazio, Luana Lionetto, Martina Curto, Luisa Iacovelli, Caroline S. Copeland, Stuart A. Neale, Valeria Bruno, Giuseppe Battaglia, Thomas E. Salt, Ferdinando Nicoletti, Cinnabarinic acid and xanthurenic acid: Two kynurenine metabolites that interact with metabotropic glutamate receptors, Neuropharmacology, Volume 112, Part B, 2017,	-	-	SCIENCE DIRECT	NO
H. Duan, Y. Luo, H. Hao, L. Feng, Y. Zhang, D. Lu, S. Xing, J. Feng, D. Yang, L. Song, X. Yan, Soluble CD146 in cerebrospinal fluid of active multiple sclerosis, Neuroscience, Volume 235, 2013,	-	-	SCIENCE DIRECT	NO
Min Jung Lee, Byung Joon Chang, Seikwan Oh, Seung-Yeol Nah, Ik-Hyun Cho, Korean Red Ginseng mitigates spinal demyelination in a model of acute multiple sclerosis by downregulating p38 mitogen-activated protein kinase and nuclear factor-κB signaling pathways, Journal of Ginseng Research, 2017,	-	-	SCIENCE DIRECT	NO
Josephine Herz, Frauke Zipp, Volker Siffrin, Neurodegeneration in autoimmune CNS inflammation, Experimental Neurology, Volume 225, Issue 1, 2010,	-	-	SCIENCE DIRECT	NO
Mònica Maijó, Sarah J. Clements, Kamal Ivory, Claudio Nicoletti, Simon R. Carding, Nutrition, diet and immunosenescence, Mechanisms of Ageing and Development, Volumes 136–137, 2014,	-	-	SCIENCE DIRECT	NO
Thaís B. Alberti, Rodrigo Marcon, Maíra A. Bicca, Nádia R.B. Raposo, João B. Calixto, Rafael C. Dutra, Essential oil from Pterodon emarginatus seeds ameliorates experimental autoimmune encephalomyelitis by modulating Th1/Treg cell balance, Journal of Ethnopharmacology, Volume 155, Issue 1, 2014,	-	-	SCIENCE DIRECT	NO
Natividad Garrido-Mesa, Desirée Camuesco, Belén Arribas, Mònica Comalada, Elvira Bailón, Margarita Cueto-Sola, Pilar Utrilla, Ana Nieto, Antonio Zarzuelo, María Elena Rodríguez-Cabezas, Julio Gálvez, The intestinal anti-inflammatory effect of minocycline in experimental colitis involves both its immunomodulatory and antimicrobial properties, Pharmacological Research Volume 63, Issue 4, 2011,	-	-	SCIENCE DIRECT	NO
Pulukool Sandhya, Debashish Danda, Role of vacuolar ATPase and Skp1 in Sjögren’s syndrome, Medical Hypotheses, Volume 82, Issue 3, 2014,	-	-	SCIENCE DIRECT	NO
Anantha Maharasi RamaKrishnan, Kavitha Sankaranarayanan, Understanding autoimmunity: The ion channel perspective, Autoimmunity Reviews, Volume 15, Issue 7, 2016,	-	-	SCIENCE DIRECT	NO
Milos Kostic, Nikola Zivkovic, Ana Cvetanovic, Ivana Stojanovic, Miodrag Colic, IL-17 signalling in astrocytes promotes glutamate excitotoxicity: Indications for the link between inflammatory and neurodegenerative events in multiple sclerosis, Multiple Sclerosis and Related Disorders, Volume 11, 2017,	-	-	SCIENCE DIRECT	NO
Giulio Volpe, Joshua D. Bernstock, Luca Peruzzotti-Jametti, Stefano Pluchino, Modulation of host immune responses following non-hematopoietic stem cell transplantation: Translational implications in progressive multiple sclerosis, Journal of Neuroimmunology, 2016,	-	-	SCIENCE DIRECT	NO
Rob ter Horst, Martin Jaeger, Sanne P. Smeekens, Marije Oosting, Morris A. Swertz, Yang Li, Vinod Kumar, Dimitri A. Diavatopoulos, Anne F.M. Jansen, Heidi Lemmers, Helga Toenhake-Dijkstra, Antonius E. van Herwaarden, Matthijs Janssen, Renate G. van der Molen, Irma Joosten, Fred C.G.J. Sweep, Johannes W. Smit, Romana T. Netea-Maier, Mieke M.J.F. Koenders, Ramnik J. Xavier, Jos W.M. van der Meer, C…	-	-	SCIENCE DIRECT	NO
Francesc Baixauli, Rebeca Acín-Pérez, Carolina Villarroya-Beltrí, Carla Mazzeo, Norman Nuñez-Andrade, Enrique Gabandé-Rodriguez, Maria Dolores Ledesma, Alberto Blázquez, Miguel Angel Martin, Juan Manuel Falcón-Pérez, Juan Miguel Redondo, Jose Antonio Enríquez, Maria Mittelbrunn, Mitochondrial Respiration Controls Lysosomal Function during Inflammatory T Cell Responses, Cell Metabolism, Volume 22,…	-	-	SCIENCE DIRECT	NO
Saleh A. Bakheet, Mohammad Zeed Alzahrani, Ahmed Nadeem, Mushtaq Ahmad Ansari, Khairy M A Zoheir, Sabry M. Attia, Laila Yousef AL-Ayadhi, Sheikh Fayaz Ahmad, Resveratrol treatment attenuates chemokine receptor expression in the BTBR T+tf/J mouse model of autism, Molecular and Cellular Neuroscience, Volume 77, 2016,	-	-	SCIENCE DIRECT	NO
Hrvoje Jakovac, Tanja Grubić Kezele, Sandra Šućurović, Biserka Mulac-Jeričević, Biserka Radošević-Stašić, Osteopontin–metallothionein I/II interactions in experimental autoimmunune encephalomyelitis, Neuroscience, Volume 350, 2017,	-	-	SCIENCE DIRECT	NO
Peter Bai, Biology of Poly(ADP-Ribose) Polymerases: The Factotums of Cell Maintenance, Molecular Cell, Volume 58, Issue 6, 2015,	-	-	SCIENCE DIRECT	NO
Lucille C. Rankin, David Artis, Beyond Host Defense: Emerging Functions of the Immune System in Regulating Complex Tissue Physiology, Cell, Volume 173, Issue 3, 2018,	-	-	SCIENCE DIRECT	NO
Adriano Zager, Wesley Nogueira Brandão, Rafael Oliveira Margatho, Daniel Sanzio Gimenes Cruz, Jean Pierre Peron, Sergio Tufik, Monica Levy Andersen, Monica Moresco, Fabio Pizza, Giuseppe Plazzi, Birgitte Rahbek Kornum, João Palermo-Neto Increased interferon-mediated immunity following in vitro and in vivo Modafinil treatment on peripheral immune cells, Progress in Neuro-Psychopharmacology and Bio…	-	-	SCIENCE DIRECT	NO
Annette Graham, Mitochondrial regulation of macrophage cholesterol homeostasis, Free Radical Biology and Medicine, Volume 89, 2015,	-	-	SCIENCE DIRECT	NO
Francesco Di Virgilio, Stefania Ceruti, Placido Bramanti, Maria P. Abbracchio, Purinergic signalling in inflammation of the central nervous system, Trends in Neurosciences, Volume 32, Issue 2, 2009,	-	-	SCIENCE DIRECT	NO
Markus Kipp, Tanja Hochstrasser, Christoph Schmitz, Cordian Beyer, Female sex steroids and glia cells: Impact on multiple sclerosis lesion formation and fine tuning of the local neurodegenerative cellular network, Neuroscience & Biobehavioral Reviews, Volume 67, 2016,	-	-	SCIENCE DIRECT	NO
Sergey Pustylnikov, Francesca Costabile, Silvia Beghi, Andrea Faccibene, Targeting mitochondria in cancer: current concepts and immunotherapy approaches, Translational Research, 2018,	-	-	SCIENCE DIRECT	NO
Rodrigo Pacheco, Carolina E. Prado, Magaly J. Barrientos, Sebastián Bernales, Role of dopamine in the physiology of T-cells and dendritic cells, Journal of Neuroimmunology, Volume 216, Issues 1–2, 2009,	-	-	SCIENCE DIRECT	NO
Elizabeth N. Madva, Richard D. Granstein, Nerve-derived transmitters including peptides influence cutaneous immunology, Brain, Behavior, and Immunity, Volume 34, 2013,	-	-	SCIENCE DIRECT	NO
Syed Minhaj Uddin Ahmed, Lin Luo, Akhileshwar Namani, Xiu Jun Wang, Xiuwen Tang, Nrf2 signaling pathway: Pivotal roles in inflammation, Biochimica et Biophysica Acta (BBA) - Molecular Basis of Disease, Volume 1863, Issue 2, 2017,	-	-	SCIENCE DIRECT	NO
An Zhu, Tao Zhang, Qi Wang, The phytochemistry, pharmacokinetics, pharmacology and toxicity of Euphorbia semen, Journal of Ethnopharmacology, Volume 227, 2018,	-	-	SCIENCE DIRECT	NO
Alline C. Campos, Manoela V. Fogaça, Andreza B. Sonego, Francisco S. Guimarães, Cannabidiol, neuroprotection and neuropsychiatric disorders, Pharmacological Research, Volume 112, 2016,	-	-	SCIENCE DIRECT	NO
Rahimi, M. Faizi, F. Talebi, F. Noorbakhsh, F. Kahrizi, N. Naderi, Interaction between the protective effects of cannabidiol and palmitoylethanolamide in experimental model of multiple sclerosis in C57BL/6 mice, Neuroscience, Volume 290, 2015,	-	-	SCIENCE DIRECT	NO
Lucile Capuron, Andrew H. Miller, Immune system to brain signaling: Neuropsychopharmacological implications, Pharmacology & Therapeutics, Volume 130, Issue 2, 2011,	-	-	SCIENCE DIRECT	NO
Qiuyan Liu, Triptolide and its expanding multiple pharmacological functions, International Immunopharmacology, Volume 11, Issue 3, 2011,	-	-	SCIENCE DIRECT	NO
Valery Bochkov, Bernd Gesslbauer, Christina Mauerhofer, Maria Philippova, Paul Erne, Olga V. Oskolkova, Pleiotropic effects of oxidized phospholipids, Free Radical Biology and Medicine, Volume 111, 2017,	-	-	SCIENCE DIRECT	NO
Farhad Jadidi-Niaragh, Abbas Mirshafiey, Histamine and histamine receptors in pathogenesis and treatment of multiple sclerosis, Neuropharmacology, Volume 59, Issue 3, 2010,	-	-	SCIENCE DIRECT	NO
Udi Nussinovitch, Yehuda Shoenfeld, The role of gender and organ specific autoimmunity, Autoimmunity Reviews, Volume 11, Issues 6–7, 2012,	-	-	SCIENCE DIRECT	NO
Isabel Cabas, Elena Chaves-Pozo, Victoriano Mulero, Alfonsa García-Ayala, Role of estrogens in fish immunity with special emphasis on GPER1, Developmental & Comparative Immunology, Volume 89, 2018,	-	-	SCIENCE DIRECT	NO
Stefan Offermanns, Markus Schwaninger, Nutritional or pharmacological activation of HCA2 ameliorates neuroinflammation, Trends in Molecular Medicine, Volume 21, Issue 4, 2015,	-	-	SCIENCE DIRECT	NO
Tomoko Mori, Kenji Kabashima, Shoko Fukamachi, Etsushi Kuroda, Jun-ichi Sakabe, Miwa Kobayashi, Saeko Nakajima, Kazuhisa Nakano, Yoshiya Tanaka, Sho Matsushita, Motonobu Nakamura, Yoshiki Tokura, D1-like dopamine receptors antagonist inhibits cutaneous immune reactions mediated by Th2 and mast cells, Journal of Dermatological Science, Volume 71, Issue 1, 2013,	-	-	SCIENCE DIRECT	NO
Roopa Bhat, Lawrence Steinman, Innate and Adaptive Autoimmunity Directed to the Central Nervous System, Neuron, Volume 64, Issue 1, 2009,	-	-	SCIENCE DIRECT	NO
Joseph J. Castillo, Zachary S. Hazlett, Robert A. Orlando, William S. Garver, A global evolutionary and metabolic analysis of human obesity gene risk variants, Gene, Volume 627, 2017,	-	-	SCIENCE DIRECT	NO
Sanna Hagman, Aliisa Mäkinen, Laura Ylä-Outinen, Heini Huhtala, Irina Elovaara, Susanna Narkilahti, Effects of inflammatory cytokines IFN-γ, TNF-α and IL-6 on the viability and functionality of human pluripotent stem cell-derived neural cells, Journal of Neuroimmunology, 2018,	-	-	SCIENCE DIRECT	NO
Gil Sharon, Timothy R. Sampson, Daniel H. Geschwind, Sarkis K. Mazmanian, The Central Nervous System and the Gut Microbiome, Cell, Volume 167, Issue 4, 2016,	-	-	SCIENCE DIRECT	NO
Luc Maroteaux, Estelle Ayme-Dietrich, Gaëlle Aubertin-Kirch, Sophie Banas, Emily Quentin, Roland Lawson, Laurent Monassier, New therapeutic opportunities for 5-HT2 receptor ligands, Pharmacology & Therapeutics, Volume 170, 2017,	-	-	SCIENCE DIRECT	NO
Calum T. Robb, Henry J. McSorley, Jinju Lee, Tomohiro Aoki, Cunjing Yu, Siobhan Crittenden, Anne Astier, Jennifer M. Felton, Nicholas Parkinson, Adane Ayele, Richard M. Breyer, Stephen M. Anderton, Shuh Narumiya, Adriano G. Rossi, Sarah E. Howie, Emma Guttman-Yassky, Richard B. Weller, Chengcan Yao, Prostaglandin E2 stimulates adaptive IL-22 production and promotes allergic contact dermatitis, Jo…	-	-	SCIENCE DIRECT	NO
Ivana Stojanović, Katarina Šavikin, Neda Đedović, Jelena Živković, Tamara Saksida, Miljana Momčilović, Ivan Koprivica, Milica Vujičić, Suzana Stanisavljević, Đorđe Miljković, Nebojša Menković, Pomegranate peel extract ameliorates autoimmunity in animal models of multiple sclerosis and type 1 diabetes, Journal of Functional Foods, Volume 35, 2017,	-	-	SCIENCE DIRECT	NO
Suad AlFadhli, Alaa A.M. Al-Zufairi, Rasheeba Nizam, Huda A. AlSaffar, Nawaf Al-Mutairi, De-regulation of diabetic regulatory genes in psoriasis: Deciphering the unsolved riddle, Gene, Volume 593, Issue 1, 2016,	-	-	SCIENCE DIRECT	NO
Richard P. Ciavarra, Mayumi Machida, Patric S. Lundberg, Phillip Gauronskas, Laurie L. Wellman, Christina Steel, Justin O. Aflatooni, Larry D. Sanford, Controllable and uncontrollable stress differentially impact pathogenicity and survival in a mouse model of viral encephalitis, Journal of Neuroimmunology, Volume 319, 2018,	-	-	SCIENCE DIRECT	NO
Gideon M. Hirschfield, Roger W. Chapman, Tom H. Karlsen, Frank Lammert, Konstantinos N. Lazaridis, Andrew L. Mason, The Genetics of Complex Cholestatic Disorders, Gastroenterology, Volume 144, Issue 7, 2013,	-	-	SCIENCE DIRECT	NO
Hubertus Himmerich, Stefanie Bartsch, Hajo Hamer, Roland Mergl, Jeremias Schönherr, Charlotte Petersein, Alexander Munzer, Kenneth Clifford Kirkby, Katrin Bauer, Ulrich Sack, Impact of mood stabilizers and antiepileptic drugs on cytokine production in-vitro, Journal of Psychiatric Research, Volume 47, Issue 11, 2013,	-	-	SCIENCE DIRECT	NO
Olga V. Chechneva, Florian Mayrhofer, Daniel J. Daugherty, David E. Pleasure, Jau-Shyong Hong, Wenbin Deng, Low dose dextromethorphan attenuates moderate experimental autoimmune encephalomyelitis by inhibiting NOX2 and reducing peripheral immune cells infiltration in the spinal cord, Neurobiology of Disease, Volume 44, Issue 1, 2011,	-	-	SCIENCE DIRECT	NO
Laura L. Dickey, Timothy M. Hanley, Thomas B. Huffaker, Andrew G. Ramstead, Ryan M. O'Connell, Thomas E. Lane, MicroRNA 155 and viral-induced neuroinflammation, Journal of Neuroimmunology, Volume 308, 2017,	-	-	SCIENCE DIRECT	NO
Robert K. Naviaux, Antipurinergic therapy for autism—An in-depth review, Mitochondrion, 2017,	-	-	SCIENCE DIRECT	NO
E.R. Barnea, O. Almogi-Hazan, R. Or, M. Mueller, F. Ria, L. Weiss, M.J. Paidas, Immune regulatory and neuroprotective properties of preimplantation factor: From newborn to adult, Pharmacology & Therapeutics, Volume 156, 2015,	-	-	SCIENCE DIRECT	NO
Mahbub Hasan, Ji-Eun Seo, Khandoker Asiqur Rahaman, Hophil Min, Ki Hun Kim, Ju-Hyung Park, Changmin Sung, Junghyun Son, Min-Jung Kang, Byung Hwa Jung, Won Sang Park, Oh-Seung Kwon, Novel genes in brain tissues of EAE-induced normal and obese mice: Upregulation of metal ion-binding protein genes in obese-EAE mice, Neuroscience, Volume 343, 2017,	-	-	SCIENCE DIRECT	NO
Falgun Shah, Antonia F. Stepan, Alison O'Mahony, Sharlene Velichko, Alexandra E. Folias, Christopher Houle, Christopher L. Shaffer, John Marcek, Jessica Whritenour, Robert Stanton, Ellen L. Berg, Mechanisms of Skin Toxicity Associated with Metabotropic Glutamate Receptor 5 Negative Allosteric Modulators, Cell Chemical Biology, Volume 24, Issue 7, 2017,	-	-	SCIENCE DIRECT	NO
Daniela S. Arroyo, Javier A. Soria, Emilia A. Gaviglio, Maria C. Rodriguez-Galan, Pablo Iribarren, Toll-like receptors are key players in neurodegeneration, International Immunopharmacology, Volume 11, Issue 10, 2011,	-	-	SCIENCE DIRECT	NO
Briana Prager, Simona F. Spampinato, Richard M. Ransohoff, Sphingosine 1-phosphate signaling at the blood–brain barrier, Trends in Molecular Medicine, Volume 21, Issue 6, 2015,	-	-	SCIENCE DIRECT	NO
Clio Dessinioti, Andreas Katsambas, Seborrheic dermatitis: Etiology, risk factors, and treatments:: Facts and controversies, Clinics in Dermatology, Volume 31, Issue 4, 2013,	-	-	SCIENCE DIRECT	NO
Xiaolan Li, Xinjia Han, Junjie Bao, Yuanyuan Liu, Aihua Ye, Mukesh Thakur, Huishu Liu, Nicotine increases eclampsia-like seizure threshold and attenuates microglial activity in rat hippocampus through the α7 nicotinic acetylcholine receptor, Brain Research, Volume 1642, 2016,	-	-	SCIENCE DIRECT	NO
Bianca Marchetti, Stefano Pluchino, Wnt your brain be inflamed? Yes, it Wnt!, Trends in Molecular Medicine, Volume 19, Issue 3, 2013,	-	-	SCIENCE DIRECT	NO
Rory D. Spence, Rhonda R. Voskuhl, Neuroprotective effects of estrogens and androgens in CNS inflammation and neurodegeneration, Frontiers in Neuroendocrinology, Volume 33, Issue 1, 2012,	-	-	SCIENCE DIRECT	NO
Zhejie Chen, Chen Zhang, Fei Gao, Qiang Fu, Chaomei Fu, Yao He, Jinming Zhang, A systematic review on the rhizome of Ligusticum chuanxiong Hort. (Chuanxiong), Food and Chemical Toxicology, Volume 119, 2018,	-	-	SCIENCE DIRECT	NO
Sabrina Giacoppo, Federica Pollastro, Gianpaolo Grassi, Placido Bramanti, Emanuela Mazzon, Target regulation of PI3K/Akt/mTOR pathway by cannabidiol in treatment of experimental multiple sclerosis, Fitoterapia, Volume 116, 2017,	-	-	SCIENCE DIRECT	NO
Thomas Julius Borody, Jordana Campbell, Fecal Microbiota Transplantation: Techniques, Applications, and Issues, Gastroenterology Clinics of North America, Volume 41, Issue 4, 2012,	-	-	SCIENCE DIRECT	NO
Dafne Franz, Francisco Contreras, Hugo González, Carolina Prado, Daniela Elgueta, Claudio Figueroa, Rodrigo Pacheco, Dopamine receptors D3 and D5 regulate CD4+T-cell activation and differentiation by modulating ERK activation and cAMP production, Journal of Neuroimmunology, Volume 284, 2015,	-	-	SCIENCE DIRECT	NO
M. Mecha, F.J. Carrillo-Salinas, A. Feliú, L. Mestre, C. Guaza, Microglia activation states and cannabinoid system: Therapeutic implications, Pharmacology & Therapeutics, Volume 166, 2016,	-	-	SCIENCE DIRECT	NO
Kashi Raj Bhattarai, Raghupatil Junjappa, Mallikarjun Handigund, Hyung-Ryong Kim, Han-Jung Chae, The imprint of salivary secretion in autoimmune disorders and related pathological conditions, Autoimmunity Reviews, Volume 17, Issue 4, 2018,	-	-	SCIENCE DIRECT	NO
Rafael Franco, Diana Fernández-Suárez, Alternatively activated microglia and macrophages in the central nervous system, Progress in Neurobiology, Volume 131, 2015,	-	-	SCIENCE DIRECT	NO
Dashyant Dhanak, James P. Edwards, Ancho Nguyen, Peter J. Tummino, Small-Molecule Targets in Immuno-Oncology, Cell Chemical Biology, Volume 24, Issue 9, 2017,	-	-	SCIENCE DIRECT	NO
Shlomo Yehuda, Sharon Rabinovitz, Olfactory bulbectomy as a putative model for Alzheimer’: The protective role of essential fatty acids, PharmaNutrition, Volume 2, Issue 1, 2014,	-	-	SCIENCE DIRECT	NO
Trevor W. Stone, Nicholas Stoy, L. Gail Darlington, An expanding range of targets for kynurenine metabolites of tryptophan, Trends in Pharmacological Sciences, Volume 34, Issue 2, 2013,	-	-	SCIENCE DIRECT	NO
Vijay Kumar, Ahmad Ali, Targeting calpains: A novel immunomodulatory approach for microbial infections, European Journal of Pharmacology, Volume 814, 2017,	-	-	SCIENCE DIRECT	NO
Francis J. Herman, Giulio Maria Pasinetti, Principles of inflammasome priming and inhibition: Implications for psychiatric disorders, Brain, Behavior, and Immunity, Volume 73, 2018,	-	-	SCIENCE DIRECT	NO
Mandana Mohyeddin Bonab, Maryam Mohajeri, Mohammad Ali Sahraian, Mahboubeh Yazdanifar, Aida Aghsaie, Ali Farazmand, Behrooz Nikbin, Evaluation of Cytokines in Multiple Sclerosis Patients Treated with Mesenchymal Stem Cells, Archives of Medical Research, Volume 44, Issue 4, 2013,	-	-	SCIENCE DIRECT	NO
Bertrand Allard, Paul A Beavis, Phillip K Darcy, John Stagg, Immunosuppressive activities of adenosine in cancer, Current Opinion in Pharmacology, Volume 29, 2016,	-	-	SCIENCE DIRECT	NO
Koen Venken, Niels Hellings, Roland Liblau, Piet Stinissen, Disturbed regulatory T cell homeostasis in multiple sclerosis, Trends in Molecular Medicine, Volume 16, Issue 2, 2010,	-	-	SCIENCE DIRECT	NO
Aline Silva de Miranda, Cun-Jin Zhang, Atsuko Katsumoto, Antônio Lúcio Teixeira, Hippocampal adult neurogenesis: Does the immune system matter?, Journal of the Neurological Sciences, Volume 372, 2017,	-	-	SCIENCE DIRECT	NO
Sarah C. Starossom, Ivan D. Mascanfroni, Jaime Imitola, Li Cao, Khadir Raddassi, Silvia F. Hernandez, Ribal Bassil, Diego O. Croci, Juan P. Cerliani, Delphine Delacour, Yue Wang, Wassim Elyaman, Samiia J. Khoury, Gabriel A. Rabinovich, Galectin-1 Deactivates Classically Activated Microglia and Protects from Inflammation-Induced Neurodegeneration, Immunity, Volume 37, Issue 2, 2012,	-	-	SCIENCE DIRECT	NO
Noelia A-González, Antonio Castrillo, Liver X receptors as regulators of macrophage inflammatory and metabolic pathways, Biochimica et Biophysica Acta (BBA) - Molecular Basis of Disease, Volume 1812, Issue 8, 2011,	-	-	SCIENCE DIRECT	NO
Jiari Lin, Guilin Li, Xiaorong Den, Changshui Xu, Shuangmei Liu, Yun Gao, Han Liu, Jun Zhang, Xin Li, Shangdong Liang, VEGF and its receptor-2 involved in neuropathic pain transmission mediated by P2X2/3 receptor of primary sensory neurons, Brain Research Bulletin, Volume 83, Issue 5, 2010,	-	-	SCIENCE DIRECT	NO
Zixue Jin, Wei Wei, Marie Yang, Yang Du, Yihong Wan, Mitochondrial Complex I Activity Suppresses Inflammation and Enhances Bone Resorption by Shifting Macrophage-Osteoclast Polarization, Cell Metabolism, Volume 20, Issue 3, 2014,	-	-	SCIENCE DIRECT	NO
George Anderson, Michael Maes, Michael Berk, Schizophrenia is primed for an increased expression of depression through activation of immuno-inflammatory, oxidative and nitrosative stress, and tryptophan catabolite pathways, Progress in Neuro-Psychopharmacology and Biological Psychiatry, Volume 42, 2013,	-	-	SCIENCE DIRECT	NO
Ritchie C. Shoemaker, Dennis House, James C. Ryan, Defining the neurotoxin derived illness chronic ciguatera using markers of chronic systemic inflammatory disturbances: A case/control study, Neurotoxicology and Teratology, Volume 32, Issue 6, 2010,	-	-	SCIENCE DIRECT	NO
M. Janier, Quoi de neuf en dermatologie clinique ?, Annales de Dermatologie et de Vénéréologie, Volume 140, Supplement 3,2013,	-	-	SCIENCE DIRECT	NO
Diego Sbardella, Giovanni Francesco Fasciglione, Magda Gioia, Chiara Ciaccio, Grazia Raffaella Tundo, Stefano Marini, Massimo Coletta, Human matrix metalloproteinases: An ubiquitarian class of enzymes involved in several pathological processes, Molecular Aspects of Medicine, Volume 33, Issue 2, 2012,	-	-	SCIENCE DIRECT	NO
Harry E. Peery, Gregory S. Day, Shannon Dunn, Marvin J. Fritzler, Harald Prüss, Claire De Souza, Asif Doja, Karen Mossman, Lothar Resch, Chenjie Xia, Boris Sakic, Larry Belbeck, Warren G. Foster, Anti-NMDA receptor encephalitis. The disorder, the diagnosis and the immunobiology, Autoimmunity Reviews, Volume 11, Issue 12, 2012,	-	-	SCIENCE DIRECT	NO
Harris Eyre, Bernhard T. Baune, Neuroimmunological effects of physical exercise in depression, Brain, Behavior, and Immunity, Volume 26, Issue 2, 2012,	-	-	SCIENCE DIRECT	NO
William B. Rolland, Tim Lekic, Paul R. Krafft, Yu Hasegawa, Orhan Altay, Richard Hartman, Robert Ostrowski, Anatol Manaenko, Jiping Tang, John H. Zhang, Fingolimod reduces cerebral lymphocyte infiltration in experimental models of rodent intracerebral hemorrhage, Experimental Neurology, Volume 241, 2013,	-	-	SCIENCE DIRECT	NO
Yuanyuan Ma, Jixian Wang, Yongting Wang, Guo-Yuan Yang, The biphasic function of microglia in ischemic stroke, Progress in Neurobiology, Volume 157, 2017,	-	-	SCIENCE DIRECT	NO
Jeffrey A. Cohen, Mesenchymal stem cell transplantation in multiple sclerosis, Journal of the Neurological Sciences, Volume 333, Issues 1–2, 2013,	-	-	SCIENCE DIRECT	NO
Brian Leonard, Michael Maes, Mechanistic explanations how cell-mediated immune activation, inflammation and oxidative and nitrosative stress pathways and their sequels and concomitants play a role in the pathophysiology of unipolar depression, Neuroscience & Biobehavioral Reviews, Volume 36, Issue 2, 2012,	-	-	SCIENCE DIRECT	NO
Ping Kwan, Osteoporosis: From osteoscience to neuroscience and beyond, Mechanisms of Ageing and Development, Volume 145, 2015,	-	-	SCIENCE DIRECT	NO
L. Probert, TNF and its receptors in the CNS: The essential, the desirable and the deleterious effects, Neuroscience, Volume 302, 2015,	-	-	SCIENCE DIRECT	NO
Shuai Wang, Yujian Wang, Xiaoni Sun, Zhenchao Zhang, Tingqi Liu, Javaid Ali Gadahi, Lixin Xu, Ruofeng Yan, Xiaokai Song, Xiangrui Li, Protective immunity against acute toxoplasmosis in BALB/c mice induced by a DNA vaccine encoding Toxoplasma gondii 10kDa excretory–secretory antigen (TgESA10), Veterinary Parasitology, Volume 214, Issues 1–2, 2015,	-	-	SCIENCE DIRECT	NO
Andreas Junker, Pathophysiology of translational regulation by microRNAs in multiple sclerosis, FEBS Letters, Volume 585, Issue 23, 2011,	-	-	SCIENCE DIRECT	NO
Shin-Chang Kuo, Yi-Wei Yeh, Chun-Yen Chen, Chang-Chih Huang, Pei-Shen Ho, Chih-Sung Liang, Chun-Long Lin, Ta-Chuan Yeh, Chang-Chih Tsou, Bao-Zhu Yang, Ru-Band Lu, San-Yuan Huang, Differential effect of the DRD3 genotype on inflammatory cytokine responses during abstinence in amphetamine-dependent women, Psychoneuroendocrinology, Volume 97, 2018,	-	-	SCIENCE DIRECT	NO
J. Sibilia, Quoi de neuf en médecine en 2007 ?, Annales de Dermatologie et de Vénéréologie, Volume 134, Supplement 1, 2007,	-	-	SCIENCE DIRECT	NO
Denise Drago, Chiara Cossetti, Nunzio Iraci, Edoardo Gaude, Giovanna Musco, Angela Bachi, Stefano Pluchino, The stem cell secretome and its role in brain repair, Biochimie, Volume 95, Issue 12, 2013,	-	-	SCIENCE DIRECT	NO
Shigehisa Yanagi, Takahiro Sato, Kenji Kangawa, Masamitsu Nakazato, The Homeostatic Force of Ghrelin, Cell Metabolism, Volume 27, Issue 4, 2018,	-	-	SCIENCE DIRECT	NO
April Au, Anita Feher, Lucy McPhee, Ailya Jessa, Soojin Oh, Gillian Einstein,VEstrogens, inflammation and cognition, Frontiers in Neuroendocrinology, Volume 40, 2016,	-	-	SCIENCE DIRECT	NO
Georgia Deretzi, Jannis Kountouras, Nikolaos Grigoriadis, Christos Zavos, Stavros Chatzigeorgiou, Evangelos Koutlas, Iakovos Tsiptsios, From the “little brain” gastrointestinal infection to the “big brain” neuroinflammation: A proposed fast axonal transport pathway involved in multiple sclerosis, Medical Hypotheses, Volume 73, Issue 5, 2009,	-	-	SCIENCE DIRECT	NO
Zhi Zhang, Amar Jyoti, Bindu Balakrishnan, Monica Williams, Sarabdeep Singh, Diane C. Chugani, Sujatha Kannan, Trajectory of inflammatory and microglial activation markers in the postnatal rabbit brain following intrauterine endotoxin exposure, Neurobiology of Disease, Volume 111, 2018,	-	-	SCIENCE DIRECT	NO
S. Gustavsen, H.B. Søndergaard, D.B. Oturai, B. Laursen, J.H. Laursen, M. Magyari, H. Ullum, M.H. Larsen, F. Sellebjerg, A.B. Oturai, Shift work at young age is associated with increased risk of multiple sclerosis in a Danish population, Multiple Sclerosis and Related Disorders, Volume 9, 2016,	-	-	SCIENCE DIRECT	NO
Sarah A. Hiles, Amanda L. Baker, Theo de Malmanche, John Attia, A meta-analysis of differences in IL-6 and IL-10 between people with and without depression: Exploring the causes of heterogeneity, Brain, Behavior, and Immunity, Volume 26, Issue 7, 2012,	-	-	SCIENCE DIRECT	NO
Mark N. Adams, Rithwik Ramachandran, Mei-Kwan Yau, Jacky Y. Suen, David P. Fairlie, Morley D. Hollenberg, John D. Hooper, Structure, function and pathophysiology of protease activated receptors, Pharmacology & Therapeutics, Volume 130, Issue 3, 2011,	-	-	SCIENCE DIRECT	NO
Rajib Sengupta, Arne Holmgren, The role of thioredoxin in the regulation of cellular processes by S-nitrosylation, Biochimica et Biophysica Acta (BBA) - General Subjects, Volume 1820, Issue 6, 2012,	-	-	SCIENCE DIRECT	NO
Miri Brodsky, Shira Hirsh, Michael Albeck, Benjamin Sredni, Resolution of inflammation-related apoptotic processes by the synthetic tellurium compound, AS101 following liver injury, Journal of Hepatology, Volume 51, Issue 3, 2009,	-	-	SCIENCE DIRECT	NO
Sharyn L Rossi, Hans S Keirstead, Stem cells and spinal cord regeneration, Current Opinion in Biotechnology, Volume 20, Issue 5, 2009,	-	-	SCIENCE DIRECT	NO
Coralie-Anne Mosser, Sofia Baptista, Isabelle Arnoux, Etienne Audinat, Microglia in CNS development: Shaping the brain for the future, Progress in Neurobiology, Volumes 149–150, 2017,	-	-	SCIENCE DIRECT	NO
Jayasree Basivireddy, Rishi K. Somvanshi, Ignacio A. Romero, Babette B. Weksler, Pierre-Olivier Couraud, Joel Oger, Ujendra Kumar, Somatostatin preserved blood brain barrier against cytokine induced alterations: Possible role in multiple sclerosis, Biochemical Pharmacology, Volume 86, Issue 4, 2013,	-	-	SCIENCE DIRECT	NO
Emily Sena, H. Bart van der Worp, David Howells, Malcolm Macleod, How can we improve the pre-clinical development of drugs for stroke?, Trends in Neurosciences, Volume 30, Issue 9, 2007,	-	-	SCIENCE DIRECT	NO
Anna K. Clark, Marzia Malcangio, Microglial signalling mechanisms: Cathepsin S and Fractalkine, Experimental Neurology, Volume 234, Issue 2, 2012,	-	-	SCIENCE DIRECT	NO
Barbaud, Quoi de neuf en dermatologie clinique?, Annales de Dermatologie et de Vénéréologie, Volume 141, Supplement 4, 2014,	-	-	SCIENCE DIRECT	NO
David P. Marciano, Mi Ra Chang, Cesar A. Corzo, Devrishi Goswami, Vinh Q. Lam, Bruce D. Pascal, Patrick R. Griffin, The Therapeutic Potential of Nuclear Receptor Modulators for Treatment of Metabolic Disorders: PPARγ, RORs, and Rev-erbs, Cell Metabolism, Volume 19, Issue 2, 2014,	-	-	SCIENCE DIRECT	NO
Akiyuki Uzawa, Masahiro Mori, Hiroki Masuda, Ryohei Ohtani, Tomohiko Uchida, Setsu Sawai, Satoshi Kuwabara, Interleukin-6 analysis of 572 consecutive CSF samples from neurological disorders: A special focus on neuromyelitis optica, Clinica Chimica Acta, Volume 469, 2017,	-	-	SCIENCE DIRECT	NO
Cynthia J.M. Kane, Susan M. Smith, Rajesh C. Miranda, Julie Kable, Proceedings of the 2010 annual meeting of the Fetal Alcohol Spectrum Disorders Study Group, Alcohol, Volume 46, Issue 1, 2012,	-	-	SCIENCE DIRECT	NO
Erich H. Schneider, Roland Seifert, The histamine H4-receptor and the central and peripheral nervous system: A critical analysis of the literature, Neuropharmacology, Volume 106, 2016,	-	-	SCIENCE DIRECT	NO
Tarmo Nuutinen, Medicinal properties of terpenes found in Cannabis sativa and Humulus lupulus, European Journal of Medicinal Chemistry, Volume 157, 2018,	-	-	SCIENCE DIRECT	NO
Sven Hendrix, Robert Nitsch, The role of T helper cells in neuroprotection and regeneration, Journal of Neuroimmunology, Volume 184, Issues 1–2, 2007,	-	-	SCIENCE DIRECT	NO
Radu Tanasescu, Cris S. Constantinescu, Cannabinoids and the immune system: An overview, Immunobiology, Volume 215, Issue 8, 2010,	-	-	SCIENCE DIRECT	NO
Jeanine S. Morey, Kathy A. Burek Huntington, Michelle Campbell, Tonya M. Clauss, Caroline E. Goertz, Roderick C. Hobbs, Denise Lunardi, Amanda J. Moors, Marion G. Neely, Lori H. Schwacke, Frances M. Van Dolah, De novo transcriptome assembly and RNA-Seq expression analysis in blood from beluga whales of Bristol Bay, AK, Marine Genomics, Volume 35, 2017	-	-	SCIENCE DIRECT	NO
Barbara A. Malynn, Averil Ma, Ubiquitin Makes Its Mark on Immune Regulation, Immunity, Volume 33, Issue 6, 2010,	-	-	SCIENCE DIRECT	NO
F.I. Milagro, M.L. Mansego, C. De Miguel, J.A. Martínez, Dietary factors, epigenetic modifications and obesity outcomes: Progresses and perspectives, Molecular Aspects of Medicine, Volume 34, Issue 4, 2013,	-	-	SCIENCE DIRECT	NO
Miles Sarill, Michela Zago, Jared A. Sheridan, Parameswaran Nair, Jason Matthews, Alvin Gomez, Lucie Roussel, Simon Rousseau, Qutayba Hamid, David H. Eidelman, Carolyn J. Baglole, The aryl hydrocarbon receptor suppresses cigarette-smoke-induced oxidative stress in association with dioxin response element (DRE)-independent regulation of sulfiredoxin 1, Free Radical Biology and Medicine, Volume 89,…	-	-	SCIENCE DIRECT	NO
Lydia R. Coulthard, Danielle E. White, Dominic L. Jones, Michael F. McDermott, Susan A. Burchill, p38MAPK: stress responses from molecular mechanisms to therapeutics, Trends in Molecular Medicine, Volume 15, Issue 8, 2009,	-	-	SCIENCE DIRECT	NO
Tony K.Y. Lim, Kathleen M. Anderson, Pawan Hari, Marcos Di Falco, Troy E. Reihsen, George L. Wilcox, Kumar G. Belani, Sylvie LaBoissiere, Manuel R. Pinto, David S. Beebe, Lois J. Kehl, Laura S. Stone, Evidence for a Role of Nerve Injury in Painful Intervertebral Disc Degeneration: A Cross-Sectional Proteomic Analysis of Human Cerebrospinal Fluid, The Journal of Pain, Volume 18, Issue 10, 2017,	-	-	SCIENCE DIRECT	NO
Samah R. Khalil, Yasmina M. Abd-Elhakim, Manar E. Selim, Laila Y. Al-Ayadhi, Apitoxin protects rat pups brain from propionic acid-induced oxidative stress: The expression pattern of Bcl-2 and Caspase-3 apoptotic genes, NeuroToxicology, Volume 49, 2015,	-	-	SCIENCE DIRECT	NO
Mei Hong Xiu, Gui Gang Yang, Yun Long Tan, Da Chun Chen, Shu Ping Tan, Zhi Ren Wang, Fu De Yang, Olaoluwa Okusaga, Jair C. Soares, Xiang Yang Zhang, Decreased interleukin-10 serum levels in first-episode drug-naïve schizophrenia: Relationship to psychopathology, Schizophrenia Research, Volume 156, Issue 1, 2014,	-	-	SCIENCE DIRECT	NO
Bozena Kaminska, Mariana Mota, Marina Pizzi, Signal transduction and epigenetic mechanisms in the control of microglia activation during neuroinflammation, Biochimica et Biophysica Acta (BBA) - Molecular Basis of Disease, Volume 1862, Issue 3, 2016,	-	-	SCIENCE DIRECT	NO
Fernando G. Correa, Leyre Mestre, Fabián Docagne, José Borrell, Carmen Guaza, Chapter 9 The Endocannabinoid Anandamide: From Immunomodulation to Neuroprotection. Implications for Multiple Sclerosis, Vitamins & Hormones, Academic Press, Volume 81, 2009,	-	-	SCIENCE DIRECT	NO
Wei Cai, Tuo Yang, Huan Liu, Lijuan Han, Kai Zhang, Xiaoming Hu, Xuejing Zhang, Ke-Jie Yin, Yanqin Gao, Michael V.L. Bennett, Rehana K. Leak, Jun Chen, Peroxisome proliferator-activated receptor γ (PPARγ): A master gatekeeper in CNS injury and repair, Progress in Neurobiology, Volumes 163–164, 2018,	-	-	SCIENCE DIRECT	NO
Philip C. Calder, Nabil Bosco, Raphaëlle Bourdet-Sicard, Lucile Capuron, Nathalie Delzenne, Joel Doré, Claudio Franceschi, Markus J. Lehtinen, Tobias Recker, Stefano Salvioli, Francesco Visioli, Health relevance of the modification of low grade inflammation in ageing (inflammageing) and the role of nutrition, Ageing Research Reviews, Volume 40, 2017,	-	-	SCIENCE DIRECT	NO
Javier Egea, Isabel Fabregat, Yves M. Frapart, Pietro Ghezzi, Agnes Görlach, Thomas Kietzmann, Kateryna Kubaichuk, Ulla G. Knaus, Manuela G. Lopez, Gloria Olaso-Gonzalez, Andreas Petry, Rainer Schulz, Jose Vina, Paul Winyard, Kahina Abbas, Opeyemi S. Ademowo, Catarina B. Afonso, Ioanna Andreadou, Haike Antelmann, Fernando Antunes, Mutay Aslan, Markus M. Bachschmid, Rui M. Barbosa, Vsevolod Belous…	-	-	SCIENCE DIRECT	NO
Graham A.W. Rook, Christopher A. Lowry, Charles L. Raison, Lymphocytes in neuroprotection, cognition and emotion: Is intolerance really the answer?, Brain, Behavior, and Immunity, Volume 25, Issue 4, 2011,	-	-	SCIENCE DIRECT	NO
Drew Pardoll, Cancer and the Immune System: Basic Concepts and Targets for Intervention, Seminars in Oncology, Volume 42, Issue 4, 2015,	-	-	SCIENCE DIRECT	NO
Makoto Murakami, Yoshitaka Taketomi, Yoshimi Miki, Hiroyasu Sato, Tetsuya Hirabayashi, Kei Yamamoto, Recent progress in phospholipase A2 research: From cells to animals to humans, Progress in Lipid Research, Volume 50, Issue 2, 2011,	-	-	SCIENCE DIRECT	NO
Christopher Chang, M. Eric Gershwin, Drugs and autoimmunity – A contemporary review and mechanistic approach, Journal of Autoimmunity, Volume 34, Issue 3, 2010,	-	-	SCIENCE DIRECT	NO
Roland Liblau, Glatiramer acetate for the treatment of multiple sclerosis: evidence for a dual anti-inflammatory and neuroprotective role, Journal of the Neurological Sciences, Volume 287, Supplement 1, 2009,	-	-	SCIENCE DIRECT	NO
Jianxiong Jiang, Ray Dingledine, Prostaglandin receptor EP2 in the crosshairs of anti-inflammation, anti-cancer, and neuroprotection, Trends in Pharmacological Sciences, Volume 34, Issue 7, 2013,	-	-	SCIENCE DIRECT	NO
Chengrui An, Yejie Shi, Peiying Li, Xiaoming Hu, Yu Gan, Ruth A. Stetler, Rehana K. Leak, Yanqin Gao, Bao-Liang Sun, Ping Zheng, Jun Chen, Molecular dialogs between the ischemic brain and the peripheral immune system: Dualistic roles in injury and repair, Progress in Neurobiology, Volume 115, 2014,	-	-	SCIENCE DIRECT	NO
Luca Antonioli, Balázs Csóka, Matteo Fornai, Rocchina Colucci, Endre Kókai, Corrado Blandizzi, György Haskó, Adenosine and inflammation: what's new on the horizon?, Drug Discovery Today, Volume 19, Issue 8, 2014,	-	-	SCIENCE DIRECT	NO
Dulce Calçada, Dario Vianello, Enrico Giampieri, Claudia Sala, Gastone Castellani, Albert de Graaf, Bas Kremer, Ben van Ommen, Edith Feskens, Aurelia Santoro, Claudio Franceschi, Jildau Bouwman, The role of low-grade inflammation and metabolic flexibility in aging and nutritional modulation thereof: A systems biology approach, Mechanisms of Ageing and Development, Volumes 136–137, 2014,	-	-	SCIENCE DIRECT	NO
Kyoungho Suk, Lipocalin-2 as a therapeutic target for brain injury: An astrocentric perspective, Progress in Neurobiology, Volume 144, 2016,	-	-	SCIENCE DIRECT	NO
Majid Pahlevan Kakhki, Nahid Rakhshi, Masoumeh Heidary, Mehrdad Behmanesh, Abbas Nikravesh, Expression of suppressor of cytokine signaling 1 (SOCS1) gene dramatically increases in relapsing–remitting multiple sclerosis, Journal of the Neurological Sciences, Volume 350, Issues 1–2, 2015,	-	-	SCIENCE DIRECT	NO
Ada G. Blidner, Santiago P. Méndez-Huergo, Alejandro J. Cagnoni, Gabriel A. Rabinovich, Re-wiring regulatory cell networks in immunity by galectin–glycan interactions, FEBS Letters, Volume 589, Issue 22, 2015,	-	-	SCIENCE DIRECT	NO
Jing SONG, Ying LIU, Hui Fang ZHANG, Qin Li ZHANG, Qiao NIU, Effects of Exposure to Aluminum on Long-term Potentiation and AMPA Receptor Subunits in Rats in vivo, Biomedical and Environmental Sciences, Volume 27, Issue 2, 2014,	-	-	SCIENCE DIRECT	NO
Junping Xin, Derek A. Wainwright, Nichole A. Mesnard, Craig J. Serpe, Virginia M. Sanders, Kathryn J. Jones, IL-10 within the CNS is necessary for CD4+ T cells to mediate neuroprotection, Brain, Behavior, and Immunity, Volume 25, Issue 5, 2011,	-	-	SCIENCE DIRECT	NO
N. Weiss, F. Miller, S. Cazaubon, P.-O. Couraud, Implication de la barrière hématoencéphalique dans la physiopathologie des maladies neurologiques : Partie II, Revue Neurologique, Volume 165, Issue 12, 2009,	-	-	SCIENCE DIRECT	NO
Ty M. Thomson, Alain Sewer, Florian Martin, Vincenzo Belcastro, Brian P. Frushour, Stephan Gebel, Jennifer Park, Walter K. Schlage, Marja Talikka, Dmitry M. Vasilyev, Jurjen W. Westra, Julia Hoeng, Manuel C. Peitsch, Quantitative assessment of biological impact using transcriptomic data and mechanistic network models, Toxicology and Applied Pharmacology, Volume 272, Issue 3, 2013,	-	-	SCIENCE DIRECT	NO
Isabella Peruga, Silvia Hartwig, Jan Thöne, Bernhard Hovemann, Ralf Gold, Georg Juckel, Ralf A. Linker, Inflammation modulates anxiety in an animal model of multiple sclerosis, Behavioural Brain Research, Volume 220, Issue 1, 2011,	-	-	SCIENCE DIRECT	NO
David Wallach, Andrew Kovalenko, 12th international TNF conference: The good, the bad and the scientists, Cytokine & Growth Factor Reviews, Volume 20, Issue 4, 2009,	-	-	SCIENCE DIRECT	NO
Nguan Soon Tan, Manuel Vázquez-Carrera, Alexandra Montagner, Ming Keat Sng, Hervé Guillou, Walter Wahli, Transcriptional control of physiological and pathological processes by the nuclear receptor PPARβ/δ, Progress in Lipid Research, Volume 64, 2016,	-	-	SCIENCE DIRECT	NO
Berislav V. Zlokovic, John H. Griffin, Cytoprotective protein C pathways and implications for stroke and neurological disorders, Trends in Neurosciences, Volume 34, Issue 4, 2011,	-	-	SCIENCE DIRECT	NO
Gordon Broderick, Rotem Ben-Hamo, Saurabh Vashishtha, Sol Efroni, Lubov Nathanson, Zachary Barnes, Mary Ann Fletcher, Nancy Klimas, Altered immune pathway activity under exercise challenge in Gulf War Illness: An exploratory analysis, Brain, Behavior, and Immunity Volume 28, 2013,	-	-	SCIENCE DIRECT	NO
Deborah S. Barkauskas, R. Dixon Dorand, Jay T. Myers, Teresa A. Evans, Kestutis J. Barkauskas, David Askew, Robert Purgert, Alex Y. Huang, Focal transient CNS vessel leak provides a tissue niche for sequential immune cell accumulation during the asymptomatic phase of EAE induction, Experimental Neurology, Volume 266, 2015,	-	-	SCIENCE DIRECT	NO
Djordje Miljković, Gordana Timotijević, Marija Mostarica Stojković, Astrocytes in the tempest of multiple sclerosis, FEBS Letters, Volume 585, Issue 23, 2011,	-	-	SCIENCE DIRECT	NO
Richard J. Bodnar, Endogenous Opiates and Behavior: 2015, Peptides, Volume 88, 2017,	-	-	SCIENCE DIRECT	NO
Eléonore Beurel, Suzanne M. Michalek, Richard S. Jope, Innate and adaptive immune responses regulated by glycogen synthase kinase-3 (GSK3), Trends in Immunology, Volume 31, Issue 1, 2010,	-	-	SCIENCE DIRECT	NO
Marie Monlun, Caroline Hyernard, Patrick Blanco, Lydia Lartigue, Benjamin Faustin, Mitochondria as Molecular Platforms Integrating Multiple Innate Immune Signalings, Journal of Molecular Biology, Volume 429, Issue 1, 2017,	-	-	SCIENCE DIRECT	NO
Abhijeet D. Kulkarni, Harun M. Patel, Sanjay J. Surana, Yogesh H. Vanjari, Veena S. Belgamwar, Chandrakantsing V. Pardeshi, N,N,N-Trimethyl chitosan: An advanced polymer with myriad of opportunities in nanomedicine, Carbohydrate Polymers, Volume 157, 2017,	-	-	SCIENCE DIRECT	NO
Christophe Y. Dombu, Didier Betbeder, Airway delivery of peptides and proteins using nanoparticles, Biomaterials, Volume 34, Issue 2, 2013,	-	-	SCIENCE DIRECT	NO
Steven Moylan, Michael Berk, Olivia M. Dean, Yuval Samuni, Lana J. Williams, Adrienne O’Neil, Amie C. Hayley, Julie A. Pasco, George Anderson, Felice N. Jacka, Michael Maes, Oxidative & nitrosative stress in depression: Why so much stress?, Neuroscience & Biobehavioral Reviews Volume 45, 2014,	-	-	SCIENCE DIRECT	NO
Hadi Supriady, Muhamad Noor Alfarizal Kamarudin, Chim Kei Chan, Bey Hing Goh, Habsah Abdul Kadir, SMEAF attenuates the production of pro-inflammatory mediators through the inactivation of Akt-dependent NF-κB, p38 and ERK1/2 pathways in LPS-stimulated BV-2 microglial cells, Journal of Functional Foods, Volume 17, 2015,	-	-	SCIENCE DIRECT	NO
Joanna K. Soczynska, Rodrigo B. Mansur, Elisa Brietzke, Walter Swardfager, Sidney H. Kennedy, Hanna O. Woldeyohannes, Alissa M. Powell, Marena S. Manierka, Roger S. McIntyre, Novel therapeutic targets in depression: Minocycline as a candidate treatment, Behavioural Brain Research, Volume 235, Issue 2, 2012,	-	-	SCIENCE DIRECT	NO
Constanze A. Weber, Preema J. Mehta, Matt Ardito, Lenny Moise, Bill Martin, Anne S. De Groot, T cell epitope: Friend or Foe? Immunogenicity of biologics in context, Advanced Drug Delivery Reviews, Volume 61, Issue 11, 2009,	-	-	SCIENCE DIRECT	NO
Wenwen Yu, Huanhuan Wang, Hangjie Ying, Yingying Yu, Dandan Chen, Weihong Ge, Liyun Shi, Daphnetin attenuates microglial activation and proinflammatory factor production via multiple signaling pathways, International Immunopharmacology, Volume 21, Issue 1, 2014,	-	-	SCIENCE DIRECT	NO
D. A. Cook, G. T. Kannarkat, A. F. Cintron, Laura M. Butkovich, Kyle B. Fraser, J. Chang, N. Grigoryan, S. A. Factor, Andrew B. West, J. M. Boss & M. G. Tansey, LRRK2 levels in immune cells are increased in Parkinson’s disease, npj Parkinson's Diseasevolume 3, Article number: 11 (2017)	-	-	-	INCLUDED
